# Supplementary material for: Role of empathy in the outcomes of colorectal cancer: protocol for a population-based study in two areas in France (EMPACOL Project)
Source: PubMed Central journal article supplement — BMJ Open. 2022 Nov 29;12(11):e066559. doi: 10.1136/bmjopen-2022-066559 (PMC9710360; doi:10.1136/bmjopen-2022-066559), 2022-11-29

# BMJ Open

BMJ Open is committed to open peer review. As part of this commitment we make the peer review history of every article we publish publicly available.

When an article is published we post the peer reviewers' comments and the authors' responses online. We also post the versions of the paper that were used during peer review. These are the versions that the peer review comments apply to.

The versions of the paper that follow are the versions that were submitted during the peer review process. They are not the versions of record or the final published versions. They should not be cited or distributed as the published version of this manuscript.

BMJ Open is an open access journal and the full, final, typeset and author-corrected version of record of the manuscript is available on our site with no access controls, subscription charges or pay-per-view fees (<http://bmjopen.bmj.com>).

If you have any questions on BMJ Open's open peer review process please email [info.bmjopen@bmj.com](mailto:info.bmjopen@bmj.com)

# BMJ Open

## "EMPACOL PROJECT": THE ROLE OF EMPATHY IN THE OUTCOMES OF COLORECTAL CANCER. PROTOCOL OF A POPULATION BASED-STUDY IN TWO FRENCH AREAS

|                               |                                                                                                                                                                                                                                                                                                                                                                                                                                                                                                                 |
|-------------------------------|-----------------------------------------------------------------------------------------------------------------------------------------------------------------------------------------------------------------------------------------------------------------------------------------------------------------------------------------------------------------------------------------------------------------------------------------------------------------------------------------------------------------|
| Journal:                      | <i>BMJ Open</i>                                                                                                                                                                                                                                                                                                                                                                                                                                                                                                 |
| Manuscript ID                 | bmjopen-2022-066559                                                                                                                                                                                                                                                                                                                                                                                                                                                                                             |
| Article Type:                 | Protocol                                                                                                                                                                                                                                                                                                                                                                                                                                                                                                        |
| Date Submitted by the Author: | 13-Jul-2022                                                                                                                                                                                                                                                                                                                                                                                                                                                                                                     |
| Complete List of Authors:     | Mulliri, Andrea; CHU Caen, Lelorain, Sophie; University of Lille, Psychology, Cancer care<br>Bouvier, Véronique; Centre Hospitalier Universitaire de Caen<br>Bara, Simona; CH du Cotentin<br>Gardy, Josephine; Centre Francois Baclesse Centre de Lutte Contre le Cancer<br>Grynberg, Delphine; Université de Lille<br>MORELLO, Rémy; CHU Caen, Unité de biostatistique et recherche clinique<br>Alves, Arnaud; CHU Caen<br>Dejardin , Olivier; Centre Hospitalier Universitaire de Caen, INSERM U1086 Anticipe |
| Keywords:                     | SURGERY, Gastrointestinal tumours < GASTROENTEROLOGY, Quality in health care < HEALTH SERVICES ADMINISTRATION & MANAGEMENT                                                                                                                                                                                                                                                                                                                                                                                      |
|                               |                                                                                                                                                                                                                                                                                                                                                                                                                                                                                                                 |

SCHOLARONE™  
Manuscripts

**“EMPACOL PROJECT”:****THE ROLE OF EMPATHY IN THE OUTCOMES OF COLORECTAL CANCER.  
PROTOCOL OF A POPULATION BASED-STUDY IN TWO FRENCH AREAS****Andrea Mulliri<sup>1,2</sup>, Sophie Lelorain<sup>3</sup>, Veronique Bouvier<sup>2,4,7</sup>, Simona Bara<sup>5</sup>, Josephine Gardy<sup>2</sup>, Delphine Grynberg<sup>3</sup>, Remy Morello<sup>6,7</sup>, Arnaud Alves<sup>1,2,7</sup>, Olivier Dejardin<sup>2,7</sup>**

Correspondence to:

Andrea Mulliri

[dr.andreamulliri@gmail.com](mailto:dr.andreamulliri@gmail.com)

Author affiliations:

<sup>1</sup>Department of digestive surgery, University Hospital of Caen, Caen, France.<sup>2</sup> ANTICIPE" U1086 INSERM-University of Caen Normandy, Team « Ligue contre le Cancer », Centre François Baclesse, Caen, France.<sup>3</sup> Univ. Lille, CNRS, UMR 9193 - SCALab - Sciences Cognitives et Sciences Affectives, 59000, Lille, France.<sup>4</sup>Digestive Tumors Registry of Calvados, University Hospital of Caen, U1086 INSERM UCN-ANTICIPE, French Network of Cancer Registries (FRANCIM), Caen, France.<sup>5</sup> Registre des Cancers de la Manche, Cherbourg-Octeville, France.<sup>6</sup> Department of biostatistics and clinical research, University Hospital of Caen, Caen cedex, France.<sup>7</sup> Department of research, University Hospital of Caen, Normandy, France**ABSTRACT****Introduction**

The aim of our project (EMPACOL) will be to investigate the patient-healthcare personnel (HCP) relationship with patients diagnosed with non-metastatic colorectal cancer and how HCPs' empathy perceived by patients may influence the curative treatment of their diagnosis. This investigation will take into consideration the known clinical factors that are well described in the literature as well as the non-clinical factors.

**Methods and Analysis**

EMPACOL will be a descriptive longitudinal study that documents multicenter perspectives. Over two years involving two French areas covered by a cancer register, eight cancer treatment centers will be included where patients with non-metastatic CRC, uncomplicated at diagnosis are being treated. Based on the curative strategy, patients will be divided into three groups: Group 1 (surgery alone), Group 2 (surgery and adjuvant chemotherapy), and Group 3 (neoadjuvant therapy, surgery, and adjuvant chemotherapy).

The relationship between HCP's empathy perceived by the patient at the time of announcement and the end of the strategy, the reported quality of life (QoL) at one year following treatment, and the oncological outcomes after five years will be investigated. HCP's empathy and QoL will be evaluated respectively with the CARE and QoL C-30 questionnaire. A relationship

1 between HCP's empathy and early outcomes, particularly in terms of digestive and  
2 genitourinary sequelae, will also be studied for each treatment group. Post-treatment  
3 complications will be assessed using the Clavien Dindo classification.

4  
5 Each assessment of HCP's empathy will be associated with an estimation of the patient's  
6 emotional sphere using the HADS questionnaire.  
7  
8  
9

### 10 11 12 13 14 15 16 **Ethics and Dissemination**

17 The Institutional Review Board of the University Hospital of Caen and the ethics committee  
18 (CPP Nord Ouest I, June 2022) approved the study.  
19

20  
21  
22 **Trial registration number:** NCT05447611  
23  
24  
25

### 26 27 **EMPACOL project**

#### 28 **Strengths**

- 29 • the multicenter and prospective design of the study and the longitudinal aspect of the  
30 project
- 31 • the multidisciplinary nature of the research group made it possible to address functional  
32 sequelae, socio-territorial inequalities, and empathy, and to assess the impact of clinical  
33 and non-clinical factors in CRC
- 34 • supervision of the cancer registry to ensure that the results are representative  
35  
36  
37  
38  
39

#### 40 **Limitations**

- 41 • the lack of a CARE score threshold in the literature  
42  
43  
44
- 45 • temporal and spatial heterogeneity between clinical information and questionnaire  
46 completion  
47  
48  
49  
50  
51  
52  
53  
54  
55  
56  
57  
58  
59  
60

## BACKGROUND

### Epidemiology of Colorectal Cancer

Colorectal cancer (CRC) remains a public health problem. There were an estimated 43,336 new cases of CRC in France in 2018. This makes it, among solid tumors, the third most common cancer in men and the second most common in women. With 17,117 deaths in 2018, CRC is the second-leading cause of cancer death in men and the third-leading cause of death in women. The prognosis of CRC has improved significantly over the past 20 years<sup>1,2</sup>. For patients with colon cancer (CC) a five-year survival rate is ranged from 92% for stage I to 11% for stage IV, respectively. The multidisciplinary strategy for rectal cancer (RC) has been shown to reduce the five-year local recurrence rate to less than 10%, and increase the five-year overall survival (OS) rate beyond 50%<sup>3</sup>.

### CRC Management

Although the term "colorectal cancer" is commonly used, both multimodal treatment and functional sequelae are not the same for colon and rectal cancer<sup>4</sup>. For forms that are neither metastatic nor locally complicated (non-hemorrhagic, without occlusion or perforation) at the time of diagnosis, surgical oncologic resection (colectomy or proctectomy) represents the cornerstone of treatment with curative intent<sup>5</sup>. As suggested by recent French guidelines<sup>6</sup>, surgery is preceded by neoadjuvant treatment for locally advanced subperitoneal rectal cancer (RC). Adjuvant chemotherapy (ADJ CT) is recommended in the case of lymph node involvement (stage III) or vascular/lymphatic invasion, peri-nerve, or tumor budding. The short-term outcome of surgical resection is generally reported by mortality rates and morbidity using the Dindo-Classification Score assessed on the 90th postoperative day<sup>7</sup>. Since the 2000s, the three-month mortality of CRC patients, regardless of surgical treatment, has decreased significantly from 15.8% to 11.3%<sup>8</sup>.

Both overall and recurrence-free survival are usually the parameters for assessing long-term oncological outcomes. Although OS has increased significantly over time in all European

1 regions <sup>9</sup>, the five-year OS rate for both CC and RC depends on lymph node status (N) and  
2 cancer stage (T) <sup>10</sup>.

3  
4 Due to the significant improvement in prognosis, the functional dimensions of CRC treatment  
5 have now become inseparable from carcinological imperatives <sup>11</sup>. Historically, functional  
6 sequelae have long been considered inherent to the carcinological nature of the surgical  
7 resection and, hardly avoidable. While the prevalence and predictive factors are different  
8 depending on colonic or rectal location <sup>12</sup>. Functional sequelae (i.e., digestive and/or  
9 genitourinary sequelae) may impair patients' QoL significantly.  
10  
11  
12  
13  
14  
15  
16  
17  
18  
19  
20  
21  
22

### 23 **Quality of Life**

24 While QoL remains a priority among CRC treatment outcomes, as outlined in Axis 2 of the  
25 PLAN CANCER FRANCE, a 10-year strategy for 2021-2030, little is known regarding the  
26 evolution of QoL over time in patients operated on for CRC <sup>13</sup>. Most QoL scores drop  
27 significantly in the early postoperative period. Surgery, especially total mesorectal excision in  
28 RC is known to reduce QoL among patients significantly <sup>12</sup>. Of all digestive cancer removals,  
29 proctectomy for RC carries the greatest risk of functional sequelae and impaired QoL <sup>12</sup>

30 Among the functional sequelae observed, the definitive stoma in case of abdominoperineal  
31 excision and the digestive sequelae in sphincter conservation represent the two main risk factors  
32 of alterations in QoL.  
33  
34  
35  
36  
37  
38  
39

40 Globally, CC patients have less disabling outcomes compared to patients who have undergone  
41 RC surgery <sup>4</sup>. In the case of ADJ CT, many negative side effects are reported. Some toxicities  
42 persist after discontinuation of treatment, which may result in changes in patients' QoL.  
43  
44  
45  
46  
47  
48  
49  
50  
51  
52  
53  
54

### 55 **Role of Empathy in Care**

56 According to the definition by Collins, empathy is the ability to share another person's feelings  
57 and emotions as if they were your own. In the humanities sciences, the precise definition of  
58  
59  
60

1 empathy is the subject of ongoing academic debate. Empathy is often considered one-  
2 dimensional, but recent work has demonstrated that a multidimensional view of the concept is  
3 also conceivable in oncology <sup>14,15</sup>. Empathy is considered essential for the formation,  
4 development, and continuation of the therapeutic patient-healthcare professional relationship.  
5  
6

7 In a clinical setting, empathy involves an ability to:  
8

9  
10 -understand the patient's situation, perspective, and feelings  
11

12  
13 -communicate this understanding and verify its accuracy  
14

15  
16 -act on this understanding with the patient in a helpful way (joint planning of an optimal  
17 therapeutic strategy).  
18

19  
20 Empathy is associated with decreased distress and anxiety among patients <sup>16</sup> and increased  
21 treatment adherence <sup>17</sup>.  
22

23  
24 Other benefits of empathy include enhanced emotional management of the burden of illness,  
25 emotional acceptance, reduced anxiety, and satisfaction with care, which persists after the  
26 announcement of diagnosis <sup>18,19,20</sup>. Perceived empathy is largely explained by patient-driven  
27 and clinical variables <sup>21</sup>. Unmet patient needs are strongly and positively associated with low  
28 medical staff empathy. As such, the quality of the patient-medical staff relationship is positively  
29 associated with practitioner empathy <sup>16</sup>.  
30  
31  
32  
33  
34  
35  
36  
37  
38

39 A systematic literature review suggests a positive association between HCPs' empathy and a  
40 variety of positive patient outcomes, including increased satisfaction with care and improved  
41 QoL <sup>16</sup>.  
42  
43  
44  
45

46 The evaluation of empathy must be done at several key moments of the care journey to measure  
47 the trajectories of empathy perceived and the link between these trajectories and the outcomes  
48 of interest. For example, patients with CRC who require first-line CT present more major  
49 concerns at the time of their initial CT education sessions compared to the mean index/average  
50 concerns of patients with other tumor forms <sup>22</sup>.  
51  
52  
53  
54  
55  
56  
57  
58  
59  
60

1 Only one study has revealed the link between empathy and survival in oncology, however, it  
2 was done retrospectively (historical cohort) and they found discordant results depending on  
3 when empathy was requested <sup>23</sup>.  
4  
5

6  
7 To our knowledge, no prospective study has specifically examined the relationship between  
8 patient-perceived empathy at each stage of treatment and the consequent CRC outcomes.  
9  
10

## 11 12 13 14 15 16 **Hypothesis and Objectives of the Investigations**

17  
18 The main objective of the EMPACOL project is to investigate, in non-metastatic CRC patients,  
19 a possible correlation between perceived HCP empathy and survival (OS and DFS).  
20  
21

22  
23 The secondary objective is to evaluate the relationship between perceived HCP empathy and  
24 QoL and morbidity and mortality in patients treated for curative non-metastatic CRC.  
25  
26

27  
28 We expect to find a positive correlation between perceived HCP empathy (the patient's  
29 perception of the curative treatment received) and a reduction in morbidity/mortality and an  
30 improvement in both functional outcome and consequent QoL after one year of the performed  
31 treatment.  
32  
33

34  
35 We also aim to verify if a positive correlation exists between a high score and an improvement  
36 in survival (OS, DFS) after five years (Figure 1).  
37  
38  
39  
40  
41

## 42 43 44 **METHODS**

### 45 46 **EMPACOL Project Design**

47  
48 EMPACOL is a descriptive longitudinal study that will aim to investigate multicenter  
49 perspectives involving two French areas covered by a cancer registry. The project has been  
50 approved by the CPP. All investigators will conduct this study by the Declaration of Helsinki.  
51  
52

53  
54 Patients with non-metastatic CRC will be included from eight surgical units in France (see the  
55 list of participating centers in the Acknowledgments section) involved in the management of  
56  
57  
58  
59  
60



1 CRC, with the aim of conducting and publishing multicenter clinical trials on the theme of  
2 perceived HCP empathy, QoL, and survival.  
3

4 To anticipate and respond to the questions and issues that will be encountered in the EMPACOL  
5 project and future studies, we have planned to design a prospective multicenter pilot study  
6 (Figure 2) which will be integrated into the EMPACOL project.  
7

8 Patients will be included prospectively over a period of six months. The pilot study aims to find  
9 a link between the circuit of the questionnaire adopted by the center and the rate of response to  
10 the questionnaires. Factors that may influence the response rate will also be assessed.  
11

12 The proposed questionnaire circuit foresees the patients within Groups 1 and 2 and evaluates  
13 the perceived HCP empathy after surgical consultation. For the patients within Group 3,  
14 perceived HCP's empathy will be evaluated once the patient meets their medical and  
15 paramedical team (oncologists, radiotherapists, and surgeons), and the therapeutic sequence has  
16 been validated during a multidisciplinary consultation (MDC). Subsequent measurement of the  
17 perceived HCP's empathy will be carried out at the end of the therapeutic sequence. Each  
18 assessment of perceived HCP's empathy will be associated with an assessment of the patient's  
19 state of anxiety and depression (according to the HADS questionnaire) (Figure 3).  
20

21 We expect participating centers to indicate when the proposed circuit questionnaire will pose  
22 difficulties in terms of filling, delivery, or recovery, to optimize and streamline the following  
23 stages of the EMPACOL project. We suggest to the participating centers that they send and  
24 collect communications and the questionnaires with patients by postal service.  
25

26 QoL will be evaluated for the three therapeutic groups at the time of the announcement of the  
27 strategy simultaneously with perceived HCP empathy. The patients' QoL will be reassessed on  
28 the 90th postoperative day for Group 1 and at the end of the ADJ CT for Groups 2 and 3.  
29 Regardless of the therapeutic group, QoL will be reassessed at six months and one year after  
30 the end of treatment (Figure 3). We will aim to find a link between perceived HCP's empathy  
31 and QoL (the primary objective) and we will also study the link with morbidity and mortality  
32 of the treatment received (the secondary objective). Morbidity and mortality will be evaluated  
33  
34  
35  
36  
37  
38  
39  
40  
41  
42  
43  
44  
45  
46  
47  
48  
49  
50  
51  
52  
53  
54  
55  
56  
57  
58  
59  
60

1 at the end of the therapeutic strategy. The most severe complication will be considered in the  
2 analyses (Figure 2)  
3

4 To assess the impact of perceived HCP's empathy on oncological results, a link will be sought  
5 between overall survival at five years (the primary objective) and the appearance of local  
6 recurrence or metastatic pathology (the secondary objective).  
7  
8  
9

10 The disease will be considered metachronous in the event of a delay of appearance at six months  
11 about the diagnosis. (Figure 2)  
12  
13  
14  
15

### 16 17 18 **Inclusion Criteria**

19 We included patients aged 18 to 80 years, who were French-speaking, affiliated with a social  
20 security system, had received informed information, and not having expressed an unfavorable  
21 opinion about participating in the strategy. Carriers of non-metastatic and uncomplicated CRC  
22 (without occlusion/ perforation/bleeding), require elective therapeutic management. The  
23 included patients have a cognitive state capable of understanding and completing the  
24 questionnaires (autonomous completion).  
25  
26  
27  
28  
29  
30  
31  
32  
33  
34  
35  
36

### 37 **Exclusion Criteria**

38 We excluded patients who were minors or older than 80 years, those who resided in a  
39 department outside Calvados or Manche, those who presented a CRC other than  
40 adenocarcinoma and all metastatic forms or requiring emergency surgery (perforation,  
41 hemorrhage, occlusion), exclusive of endoscopic treatment, or a missed-CRC discovered after  
42 surgery for non-oncological indications.  
43  
44  
45  
46  
47  
48  
49

50 We also excluded patients with other neoplastic diseases under treatment and/or evolving, as  
51 well as patients with a history of inflammatory bowel disease (Crohn's disease, ulcerative  
52 colitis) and/or hereditary disease predisposing to CRC (Lynch syndrome, familial polyposis) or  
53 with severe cognitive impairment preventing proper comprehension of the questionnaires.  
54  
55  
56  
57  
58  
59

60 Pregnant women will also be excluded.

## Endpoints and Measures

### Empathy

Patient-perceived empathy was assessed using the Consultation and Relational Empathy (CARE) questionnaire that has been validated in cancer care. This is a self-reported ten-point questionnaire with a Likert-type five-point scale ranging from "poor" to "excellent". It has excellent psychometric properties with  $\alpha = 0.92$ . High scores indicate higher perception of the health care personnel's empathy.

The three distinct empathic processes were also assessed with the CARE measure. "Relationship" was assessed with items 1-3, "emotional process" with items 4-6, and "cognitive process" with items 7-10.

### Quality of Life

QoL will be evaluated using the EORTC-QLQ-C30 questionnaire. The EORTC-QLQ-C30 is equivalent to other tools, such as the GIGLI, in terms of emotional function, but superior in terms of social function<sup>24</sup>. The use of an additional tool is recommended for the assessment of depression in CRC patients<sup>25</sup>.

### Patient Anxiety and Depression

This parameter was evaluated with the HADS<sup>26</sup>. The HADS scale assesses both anxiety and depression, which commonly coexist.

### Morbidity and Mortality

The severity of medical and surgical complications was assessed using the Clavien-Dindo grading system<sup>7</sup>. Grades I and II complications involve only pharmacological treatment, while grades III, IV, and V require surgical, endoscopic, or radiological treatment. Complications below grade III were considered "minor complications" while complications above and including grade III were considered "major complications", as reported in the literature. For the

1 three groups, postoperative morbidity and mortality will be assessed at 90 postoperative days  
2 (C/D90). C/D90 will be associated with the morbidity and mortality of the other therapeutic  
3 stages, post adjuvant treatment for Group 2 (C/DADJ) and post neoadjuvant treatment  
4 (C/DNEOADJ) for Group 3, also with C/DADJ.  
5  
6  
7  
8  
9

### 10 11 **Survival and Representativeness of the Data Collected**

12 All patients diagnosed with CRC during the inclusion period were included in two specialized  
13 digestive cancer registries of North-West France, and were members of the French network of  
14 cancer registries (FRANCIM), the department of Calvados, and Manche. The resident  
15 population of these well-defined administrative areas was 1,601,928 inhabitants in 2016. Both  
16 digestive cancer registries included in the present study collected exhaustive information on  
17 treatments and stages in the framework of a high-resolution study. These registries have worked  
18 together for many years and use identical standardized data collection, recording, and validation  
19 procedures. Multiple information sources ensure an exhaustive collection of study variables.  
20 The databases are declared to the National Commission on Information Technology and Civil  
21 Liberties (CNIL). The quality of the data collected is evaluated every four years by the Institut  
22 National de la Santé et de la Recherche Médicale (INSERM), “Santé Publique France”, and  
23 the Institut National du Cancer (INCa).  
24  
25  
26  
27  
28  
29  
30  
31  
32  
33  
34  
35  
36  
37  
38  
39  
40  
41  
42  
43

### 44 **Data Collection**

45 The medical information included gender, age (<60 years, 60–69 years, 70–75 years), obesity  
46 score (BMI > 30), active smoking and alcohol use report, the ASA physical status classification  
47 system (I-II versus III-IV), anxious and depressive states (HADS score) of the patient and  
48 presentation at the multidisciplinary consultation, histology and tumor differentiation (grades  
49 I, II, and III), surgical approach (laparotomy and/or laparoscopy or robotic), as well as  
50 neoadjuvant or adjuvant treatments (type and number of sessions), and the site of the primary  
51 tumor (colon vs rectum). The forms located at the rectosigmoid junction were included in the  
52  
53  
54  
55  
56  
57  
58  
59  
60

1 colonic localizations. Socio-demographic information such as education level and marital status  
2 were used as extracted from the CRF.  
3

4 Socioeconomic status was defined using the European Deprivation Index (EDI), which is an  
5 ecological and composite indicator included in the census of the European Union's statistics on  
6 income and living conditions. For all cases, patient addresses were geolocalized using the  
7 geographic information system (ArcGIS 10.2) and assigned to a "Ilots Regroupés pour  
8 L'Information Statistique" (IRIS), a geographic area defined by the "Institut National de la  
9 Statistique et des Études Économiques" (INSEE). IRIS is the smallest geographical unit in  
10 France, for which census data are available.  
11  
12  
13  
14  
15  
16  
17  
18  
19  
20  
21  
22

### 23 **STATISTICAL ANALYSIS**

24  
25 Quantitative variables will be expressed as the mean  $\pm$  SD, and qualitative variables will be  
26 expressed as the number of patients and percentages. Regardless of the therapeutic group, the  
27 experimental design of the study allows for several measurements to be performed on the same  
28 individual during his or her oncological care and follow-up. Comparisons between the mean  
29 scores of the three treatment groups will be made using an analysis of variance (ANOVA) or a  
30 Kruskal-Wallis test, depending on whether the data follow the hypothesis of tested  
31 homoscedasticity. Post hoc comparisons will be performed using the Bonferroni Correction or  
32 the Nemenyi Test.  
33  
34  
35  
36  
37  
38  
39  
40  
41  
42  
43

44 The sensitivity and specificity of the CARE score in predicting the impact on QoL will be  
45 assessed by receiver operating characteristic curves for the score versus groups reporting  
46 no/minor or definite/major impact on QoL.  
47  
48  
49

50 The correlation between the validated CARE score and the QLQ questionnaires (EORTC's  
51 QLQ-C30) will be estimated with Pearson's Correlation Coefficient as well as Spearman's  
52 Correlation Coefficient and its 95% CI.  
53  
54  
55  
56

57 The inclusion of data indicating the impact of CARE on QoL will be based on a univariate  
58 approach and then a multivariate approach using ad hoc models depending on the nature of the  
59  
60

1 dependent variable (binary or multi-nominal logistic regression or linear regression depending  
2 on whether the Quality of Life score is considered qualitative or quantitative). Only variables  
3 with  $p < \text{or} = 0.20$  in the univariate analysis of will be included in the multivariate model. This  
4 approach will allow the identification of risk factors related to the deterioration of QoL and the  
5 assessment of their impact. All tests will be two-tailed with a significance level ( $p$ ) equal to  
6 0.05.  
7

8 We will use the Kaplan-Meier method to obtain survival curves and a Cox model to assess the  
9 impact of CARE score on survival in the three different groups. Hazard ratios (HRs) were  
10 calculated, using semi-proportional Cox hazard models, to assess the effect of the CARE score  
11 on survival in patients with nonmetastatic, uncomplicated CRC. The proportional hazard  
12 hypothesis will be tested (Schoenfeld's residuals). Variables whose threshold  $p$ -value was  
13  $\leq 0.20$  in univariate analysis (M0) will be included in the multivariate model (M1). The variable  
14 of interest (CARE score) is going to be forced into all models.  
15

16 All statistical analyses will be performed using StataSE14 (StataCorp LLC, College Station,  
17 Texas, USA).  
18

## 19 **PATIENT AND PUBLIC INVOLVEMENT**

20 Patients were not involved in the design, the recruitment and conduct of the study. The results  
21 will be disseminated to study participants by email/paper and to the physicians who included  
22 them in the study  
23

## 24 **FEASIBILITY**

25 Eight colorectal cancer centers, including both teaching hospitals and cancer centers, agreed to  
26 include 50 to 100 patients who received curative treatment between XXX and XXX (see  
27 Acknowledgments for list of participating centers). The availability of patients for inclusion in  
28 the study at each center has been demonstrated in published studies. We chose to include  
29 patients who had undergone curative treatment over two years for two reasons: the first being  
30

1 physiological, to allow their bowel function to become stable. The second is oncological, to  
2 detect local recurrence and/or distant metastases. Consistent with the recent literature, we  
3 considered differentiating the study population into two groups: those with high perceived  
4 empathy (maximum CARE score) and those without.  
5  
6  
7  
8

9 We calculated with BiostaTGV that approximately 90 patients in each group, thus 180 in total,  
10 would be needed to show clinically significant improvement in quality of life or reduction in  
11 morbidity with high CARE score (power  $\beta$  80% and risk  $\alpha$  0.05 bilaterally).  
12  
13  
14

15 From the two cancer registries, we know that over the 2-year inclusion period, the number of  
16 nonmetastatic colorectal cancers is approximately 480 cases.  
17  
18  
19

20 Assuming that the lost-to-follow-up rate is approximately 50%, we estimate that we will be able  
21 to include 250 patients.  
22  
23  
24  
25  
26

## 27 **DISCUSSION**

28 The prognosis of CRC has improved significantly over the past 20 years <sup>1,2</sup>. Oncologic  
29 principles <sup>27</sup>, the development of minimally invasive techniques <sup>28</sup>, and advances in diagnostic  
30 accuracy <sup>29</sup> are strongly linked to these outcomes and are well described in the recent literature.  
31  
32 However, many surviving patients experienced functional sequelae (i.e., digestive and/or  
33 genitourinary sequelae), that significantly impaired their QoL. Both prevalence and predictive  
34 factors are different depending on colonic or rectal location <sup>12</sup>.  
35  
36  
37  
38  
39  
40  
41  
42  
43

44 Functional disorders occur frequently following surgery for CC. The incontinence of liquid and  
45 solid stool is 24.1% and 6.9%, respectively. The most common symptoms associated with  
46 constipation are incomplete and difficult evacuation in about one-third of cases <sup>4</sup>. Major Low  
47 Anterior Resection Syndrome (LARS) was present in 21.1% <sup>4</sup>. No difference is reported in the  
48 prevalence of symptoms according to the type of colectomy <sup>4,12</sup>. In their systematic review and  
49 meta-analysis, Verkuijl et al. included 8,418 partial colectomies (4,207 right hemicolectomies  
50 and 4,211 left hemicolectomies/sigmoid colon resection, respectively), and 161 subtotal/total  
51  
52  
53  
54  
55  
56  
57  
58  
59  
60

1 colectomies and concluded that bowel function problems following colon cancer surgery are  
2 common, tend to not improve over time, and are not dependent on the type of surgery.  
3  
4 For RC, low rectal resections<sup>30</sup> and neoadjuvant radiotherapy<sup>31</sup> are known to severely impair  
5 bowel function. Up to 80% with RC undergo sphincter-preserving surgery<sup>32</sup>, without impairing  
6 oncological prognosis<sup>6,33</sup>. Between 50 and 90% of these patients will experience a change in  
7 their bowel habits afterward<sup>34,35</sup>. Eid et al found that 65.2% of RC survivors had bowel  
8 dysfunction, including 41.3% with major low anterior resection syndrome and 80% with  
9 genitourinary dysfunction<sup>12</sup>. Indeed, in addition to the psychological burden related to the  
10 tumor pathology and the concern about the probability of recovery, it is important to consider  
11 the patient's experience of the functional results and its repercussions in terms of QoL,  
12 especially in the case of complications or poor functional results. One of the worst fears related  
13 to surgery is the creation of an ostomy.  
14  
15 Problems related to stoma care or impaired genitourinary or digestive function are likely to have  
16 an impact on the QOL of CRC patients<sup>12</sup>.  
17  
18 Patients' perceived unmet rehabilitation needs during the course of their tumor pathology are  
19 associated with decreased QoL. Interventions to reduce cancer patients' perceived rehabilitation  
20 needs may improve QoL.  
21  
22 Among non-medical factors, other than socioeconomic and geographic inequalities, rural  
23 ostomy patients reported more care-related problems and lower QoL<sup>36</sup>, the relationship  
24 between patient and caregiver influences the patient's experience throughout their care.  
25  
26 A 2012 review of the literature suggested links between oncology caregiver empathy and  
27 various positive patient outcomes such as improved QOL or increased satisfaction with care<sup>16</sup>.  
28  
29 Assessment modalities for measuring empathy in medical settings are heterogeneous<sup>16</sup>.  
30  
31 The associations between the severity of medical and surgical complications and the perception  
32 of surgeon empathy have been studied in esophageal and gastric cancer patients. When patients  
33 perceived high empathy, they were less likely to report major complications<sup>15</sup>. Of the three  
34 dimensions, "rapport-building" ( $p = 0.019$ ) and "emotional process" ( $p = 0.022$ ) were predictive  
35  
36  
37  
38  
39  
40  
41  
42  
43  
44  
45  
46  
47  
48  
49  
50  
51  
52  
53  
54  
55  
56  
57  
58  
59  
60



1 of major complications. Physician empathy is essential before surgery and it is therefore  
2 important to consider the patient's experience.  
3

4 By using the CARE tool, the EMPACOL Project will allow us to evaluate the role of empathy  
5 among medical and paramedical staff perceived by the patient throughout their care and its  
6 evolution over time, particularly in the case of complications related to treatment and its impact  
7 in terms of early and late results.  
8  
9  
10  
11  
12

## 13 14 15 16 **CONCLUSIONS**

17 Health care providers need to be trained to establish a good relationship with patients, from the  
18 time of treatment announcement through the period of oncologic surveillance. Further research  
19 is needed to understand the mechanisms linking empathy to CRC management outcomes.  
20  
21

22 To this end, the pilot study will allow us to identify the best channel for distributing the  
23 questionnaire, study the clinical and non-clinical factors that may influence respondent and non-  
24 respondent rates, and look for a correlation with short-term outcomes in each therapeutic group.  
25  
26

27 The results of the pilot study will therefore help refine the methodological tools that will be  
28 used in the EMPACOL project, which aims to find a correlation between the CARE score and  
29 long-term outcomes (QoL and survival). The representativeness of the data collected and the  
30 results of the EMPACOL project will be studied through the supervision of the cancer registries  
31 that cover the two departments considered for patient inclusion.  
32  
33

34 Repeated measurements of perceived empathy, concerning the treatment received, in the same  
35 individual and a follow-up of their evolution over time, will make it possible to understand how  
36 to facilitate learning, encourage its practice in daily clinical attitudes and promote the  
37 development of empathy in the training of all actors in the caregiver-patient relationship.  
38  
39

40 Obtaining and validating an empathy score, thanks to future studies, will allow a better  
41 appreciation of the role of all non-clinical factors in the results in the oncological environment  
42 and will also open the way to other typologies of cancer.  
43  
44  
45  
46  
47  
48  
49  
50  
51  
52  
53  
54  
55  
56  
57  
58  
59  
60

1 The originality of this project is to go beyond the impact of clinical factors on the outcomes of  
2 curative treatment of CRC. The multidisciplinary collaboration and cross-cutting competencies  
3 within our research group, functional sequelae, socio-territorial inequalities, and empathy, will  
4 allow us to better understand the impact of non-medical factors and the role of empathy in the  
5 curative treatment of CRC. The prospective and longitudinal nature of this project, thanks to  
6 the supervision of the cancer registry, will allow us to comment on the representativeness of  
7 the data collected and the results obtained.  
8  
9  
10  
11  
12  
13  
14  
15  
16  
17  
18

19 **Contributors** Study conception and design: SL, AA, OD, AM. Intervention design: SL, VB,  
20 DG, JG, DG, AA, OD, SB and AM. Analysis of data will be done by AM, OD and RM. AA  
21 drafted the work, which was revised critically for intellectual content by SL. All authors gave  
22 final approval of this version to be published.  
23

24 **Competing interests** None declared.  
25

26 **Funding** The institutional promoter is the University Hospital of Caen Department of Clinical  
27 Research and Innovation  
28

29 **Data sharing statement** This is an open access article distributed in accordance with the  
30 Creative Commons Attribution Non Commercial (CC BY-NC 4.0) license, which  
31 permits others to distribute, remix, adapt, build upon this work non-commercially,  
32 and license their derivative works on different terms, provided the original work is  
33 properly cited, appropriate credit is given, any changes made indicated, and the use  
34 is non-commercial. See: <http://creativecommons.org/licenses/by-nc/4.0/>  
35  
36

37 **Ethics and dissemination** The institutional promoter is the University Hospital of Caen  
38 Department of Clinical Research and Innovation. Results of this study will be disseminated by  
39 publication through peer- reviewed professional and scientific journals. Participant data will be  
40 kept confidential and will not be shared with the public. If there are requests for data sharing  
41 for appropriate research purposes, this will be considered on an individual basis after trial  
42 completion and after the publication of the primary manuscripts.  
43  
44

45 **ORCID ID** Andrea Mulliri <https://orcid.org/0000-0002-0333-8651>  
46  
47  
48  
49  
50  
51  
52  
53  
54  
55  
56  
57  
58  
59  
60

**Figure 1** Schematic representation of the factors evaluated.

**Figure 2** the EMPACOL design

**Figure 3** Proposed questionnaire distribution circuit.

For peer review only

## REFERENCES

1. Ferlay, J. *et al.* Cancer incidence and mortality patterns in Europe: estimates for 40 countries in 2012. *Eur J Cancer* **49**, 1374–1403 (2013).
2. Siegel, R. L. *et al.* Colorectal cancer statistics, 2017. *CA Cancer J Clin* **67**, 177–193 (2017).
3. Cottet, V. *et al.* Incidence and Patterns of Late Recurrences in Rectal Cancer Patients. *Ann Surg Oncol* **22**, 520–527 (2015).
4. Verkuijl, S. J. *et al.* Functional outcomes of surgery for colon cancer: A systematic review and meta-analysis. *Eur J Surg Oncol* **47**, 960–969 (2021).
5. Labianca, R. *et al.* Primary colon cancer: ESMO Clinical Practice Guidelines for diagnosis, adjuvant treatment and follow-up. *Ann Oncol* **21 Suppl 5**, v70-77 (2010).
6. Lakkis, Z. *et al.* Management of rectal cancer: the 2016 French guidelines. *Colorectal Dis* **19**, 115–122 (2017).
7. Clavien, P. A. *et al.* The Clavien-Dindo classification of surgical complications: five-year experience. *Ann Surg* **250**, 187–196 (2009).
8. Iversen, L. H., Ingeholm, P., Gögenur, I. & Laurberg, S. Major Reduction in 30-Day Mortality After Elective Colorectal Cancer Surgery: A Nationwide Population-Based Study in Denmark 2001–2011. *Ann Surg Oncol* **21**, 2267–2273 (2014).
9. Brenner, H. *et al.* Progress in colorectal cancer survival in Europe from the late 1980s to the early 21st century: The EURO CARE study. *International Journal of Cancer* **131**, 1649–1658 (2012).
10. Gunderson, L. L., Jessup, J. M., Sargent, D. J., Greene, F. L. & Stewart, A. K. Revised TN categorization for colon cancer based on national survival outcomes data. *J Clin Oncol* **28**, 264–271 (2010).

- 1 11. Alves, A. [Recommendations for clinical practice. Therapeutic choices for rectal cancer.  
2 How can we reduce therapeutic sequelae and preserve quality of life?]. *Gastroenterol Clin*  
3 *Biol* **31 Spec No 1**, 1S52-62, 1S95-97 (2007).
- 4  
5  
6  
7 12. Eid, Y. *et al.* Digestive and genitourinary sequelae in rectal cancer survivors and their  
8 impact on health-related quality of life: Outcome of a high-resolution population-based  
9 study. *Surgery* **166**, 327–335 (2019).
- 10  
11  
12  
13  
14 13. Schmidt, C. E., Bestmann, B., Kuchler, T., Longo, W. E. & Kremer, B. Impact of age on  
15 quality of life in patients with rectal cancer. *World J Surg* **29**, 190–197 (2005).
- 16  
17  
18  
19 14. Gehenne, L. *et al.* Testing two competitive models of empathic communication in  
20 cancer care encounters: A factorial analysis of the CARE measure. *Eur J Cancer Care*  
21 *(Engl)* **29**, e13306 (2020).
- 22  
23  
24  
25  
26 15. Gehenne, L. *et al.* Associations between the severity of medical and surgical  
27 complications and perception of surgeon empathy in esophageal and gastric cancer  
28 patients. *Support Care Cancer* (2021) doi:10.1007/s00520-021-06257-y.
- 29  
30  
31  
32  
33 16. Lelorain, S., Brédart, A., Dolbeault, S. & Sultan, S. A systematic review of the  
34 associations between empathy measures and patient outcomes in cancer care.  
35 *Psychooncology* **21**, 1255–1264 (2012).
- 36  
37  
38  
39 17. Street, R. L., Gordon, H. S., Ward, M. M., Krupat, E. & Kravitz, R. L. Patient  
40 participation in medical consultations: why some patients are more involved than others.  
41 *Med Care* **43**, 960–969 (2005).
- 42  
43  
44  
45  
46 18. Spencer, R., Nilsson, M., Wright, A., Pirl, W. & Prigerson, H. Anxiety disorders in  
47 advanced cancer patients: correlates and predictors of end-of-life outcomes. *Cancer* **116**,  
48 1810–1819 (2010).
- 49  
50  
51  
52  
53 19. Mack, J. W. *et al.* Measuring therapeutic alliance between oncologists and patients with  
54 advanced cancer: The Human Connection Scale. *Cancer* **115**, 3302–3311 (2009).
- 55  
56  
57  
58 20. Gattellari, M., Butow, P. N. & Tattersall, M. H. Sharing decisions in cancer care. *Soc Sci*  
59 *Med* **52**, 1865–1878 (2001).
- 60

- 1  
2  
3  
4  
5  
6  
7  
8  
9  
10  
11  
12  
13  
14  
15  
16  
17  
18  
19  
20  
21  
22  
23  
24  
25  
26  
27  
28  
29  
30  
31  
32  
33  
34  
35  
36  
37  
38  
39  
40  
41  
42  
43  
44  
45  
46  
47  
48  
49  
50  
51  
52  
53  
54  
55  
56  
57  
58  
59  
60
21. Lelorain, S. *et al.* How does a physician's accurate understanding of a cancer patient's unmet needs contribute to patient perception of physician empathy? *Patient Educ Couns* **98**, 734–741 (2015).
22. Oguchi, M. *et al.* Measuring the impact of nurse cue-response behaviour on cancer patients' emotional cues. *Patient Educ Couns* **82**, 163–168 (2011).
23. Lelorain, S., Cortot, A., Christophe, V., Pinçon, C. & Gidron, Y. Physician Empathy Interacts with Breaking Bad News in Predicting Lung Cancer and Pleural Mesothelioma Patient Survival: Timing May Be Crucial. *J Clin Med* **7**, E364 (2018).
24. Schwenk, W. *et al.* Comparison of EORTC quality of life core questionnaire (EORTC-QLQ-C30) and gastrointestinal quality of life index (GIQLI) in patients undergoing elective colorectal cancer resection. *Int J Colorectal Dis* **19**, 554–560 (2004).
25. Aminisani, N., Nikbakht, H., Asghari Jafarabadi, M. & Shamshirgaran, S. M. Depression, anxiety, and health related quality of life among colorectal cancer survivors. *J Gastrointest Oncol* **8**, 81–88 (2017).
26. Skarstein, J., Aass, N., Fosså, S. D., Skovlund, E. & Dahl, A. A. Anxiety and depression in cancer patients: relation between the Hospital Anxiety and Depression Scale and the European Organization for Research and Treatment of Cancer Core Quality of Life Questionnaire. *J Psychosom Res* **49**, 27–34 (2000).
27. Rodríguez-Luna, M. R., Guarneros-Zárate, J. E. & Tueme-Izaguirre, J. Total Mesorectal Excision, an erroneous anatomical term for the gold standard in rectal cancer treatment. *Int J Surg* **23**, 97–100 (2015).
28. Crippa, J. *et al.* Robotic Surgery for Rectal Cancer Provides Advantageous Outcomes Over Laparoscopic Approach: Results from a Large Retrospective Cohort. *Ann Surg* **274**, e1218–e1222 (2021).
29. Zhu, G., Wu, Z., Lui, S., Hu, N. & Wu, M. Advances in Imaging Modalities and Contrast Agents for the Early Diagnosis of Colorectal Cancer. *J Biomed Nanotechnol* **17**, 558–581 (2021).

- 1 30. Keane, C., Wells, C., O'Grady, G. & Bissett, I. P. Defining low anterior resection  
2 syndrome: a systematic review of the literature. *Colorectal Dis* **19**, 713–722 (2017).  
3
- 4 31. Croese, A. D., Lonie, J. M., Trollope, A. F., Vangaveti, V. N. & Ho, Y.-H. A meta-  
5 analysis of the prevalence of Low Anterior Resection Syndrome and systematic review of  
6 risk factors. *Int J Surg* **56**, 234–241 (2018).  
7
- 8 32. Chau, A. *et al.* Toward the end of abdominoperineal resection for rectal cancer? An 8-  
9 year experience in 189 consecutive patients with low rectal cancer. *Ann Surg* **260**, 801–  
10 805; discussion 805-806 (2014).  
11
- 12 33. Rullier, E. *et al.* Sphincter-Saving Resection for All Rectal Carcinomas: The End of the  
13 2-cm Distal Rule. *Annals of Surgery* **241**, 465–469 (2005).  
14
- 15 34. Bryant, C. L. C., Lunniss, P. J., Knowles, C. H., Thaha, M. A. & Chan, C. L. H.  
16 Anterior resection syndrome. *Lancet Oncol* **13**, e403-408 (2012).  
17
- 18 35. Ziv, Y., Zbar, A., Bar-Shavit, Y. & Igov, I. Low anterior resection syndrome (LARS):  
19 cause and effect and reconstructive considerations. *Tech Coloproctol* **17**, 151–162 (2013).  
20
- 21 36. Näverlo, S., Gunnarsson, U. & Strigård, K. Rectal cancer patients from rural areas in  
22 northern Sweden report more pain and problems with stoma care than those from urban  
23 areas. *Rural Remote Health* **21**, 5471 (2021).  
24  
25  
26  
27  
28  
29  
30  
31  
32  
33  
34  
35  
36  
37  
38  
39  
40  
41  
42  
43  
44  
45  
46  
47  
48  
49  
50  
51  
52  
53  
54  
55  
56  
57  
58  
59  
60

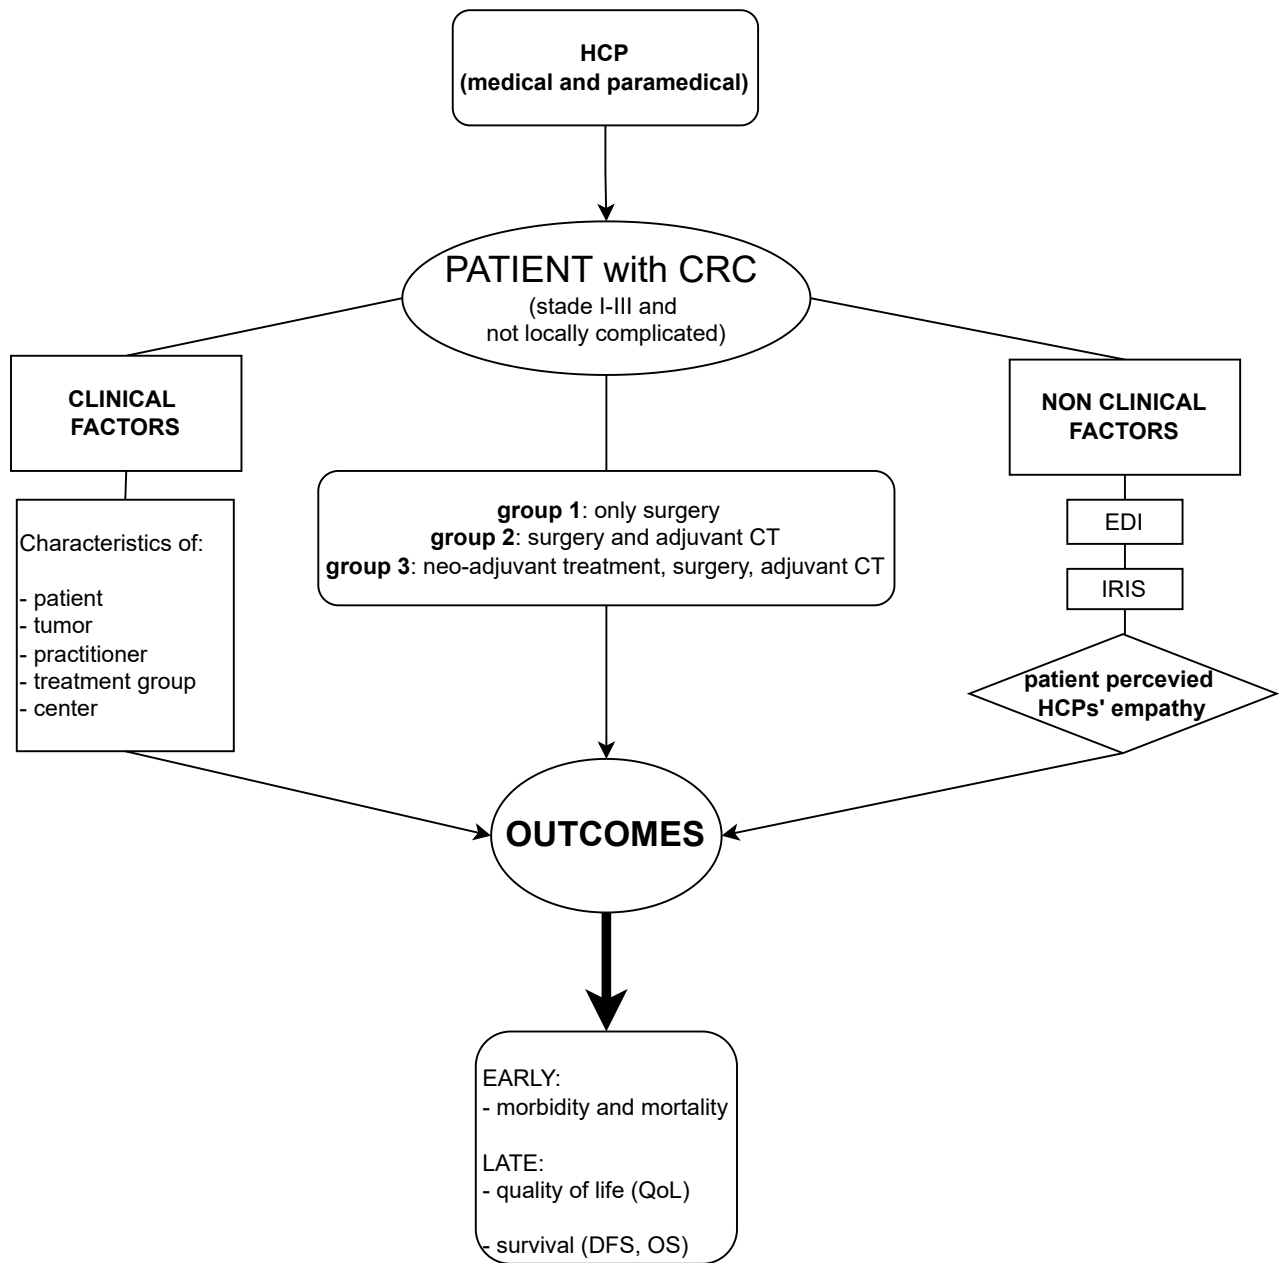



1  
2  
3  
4  
5  
6  
7  
8  
9  
10  
11  
12  
13  
14  
15  
16  
17  
18  
19  
20  
21  
22  
23  
24  
25  
26  
27  
28  
29  
30  
31  
32  
33  
34  
35  
36  
37  
38  
39  
40  
41

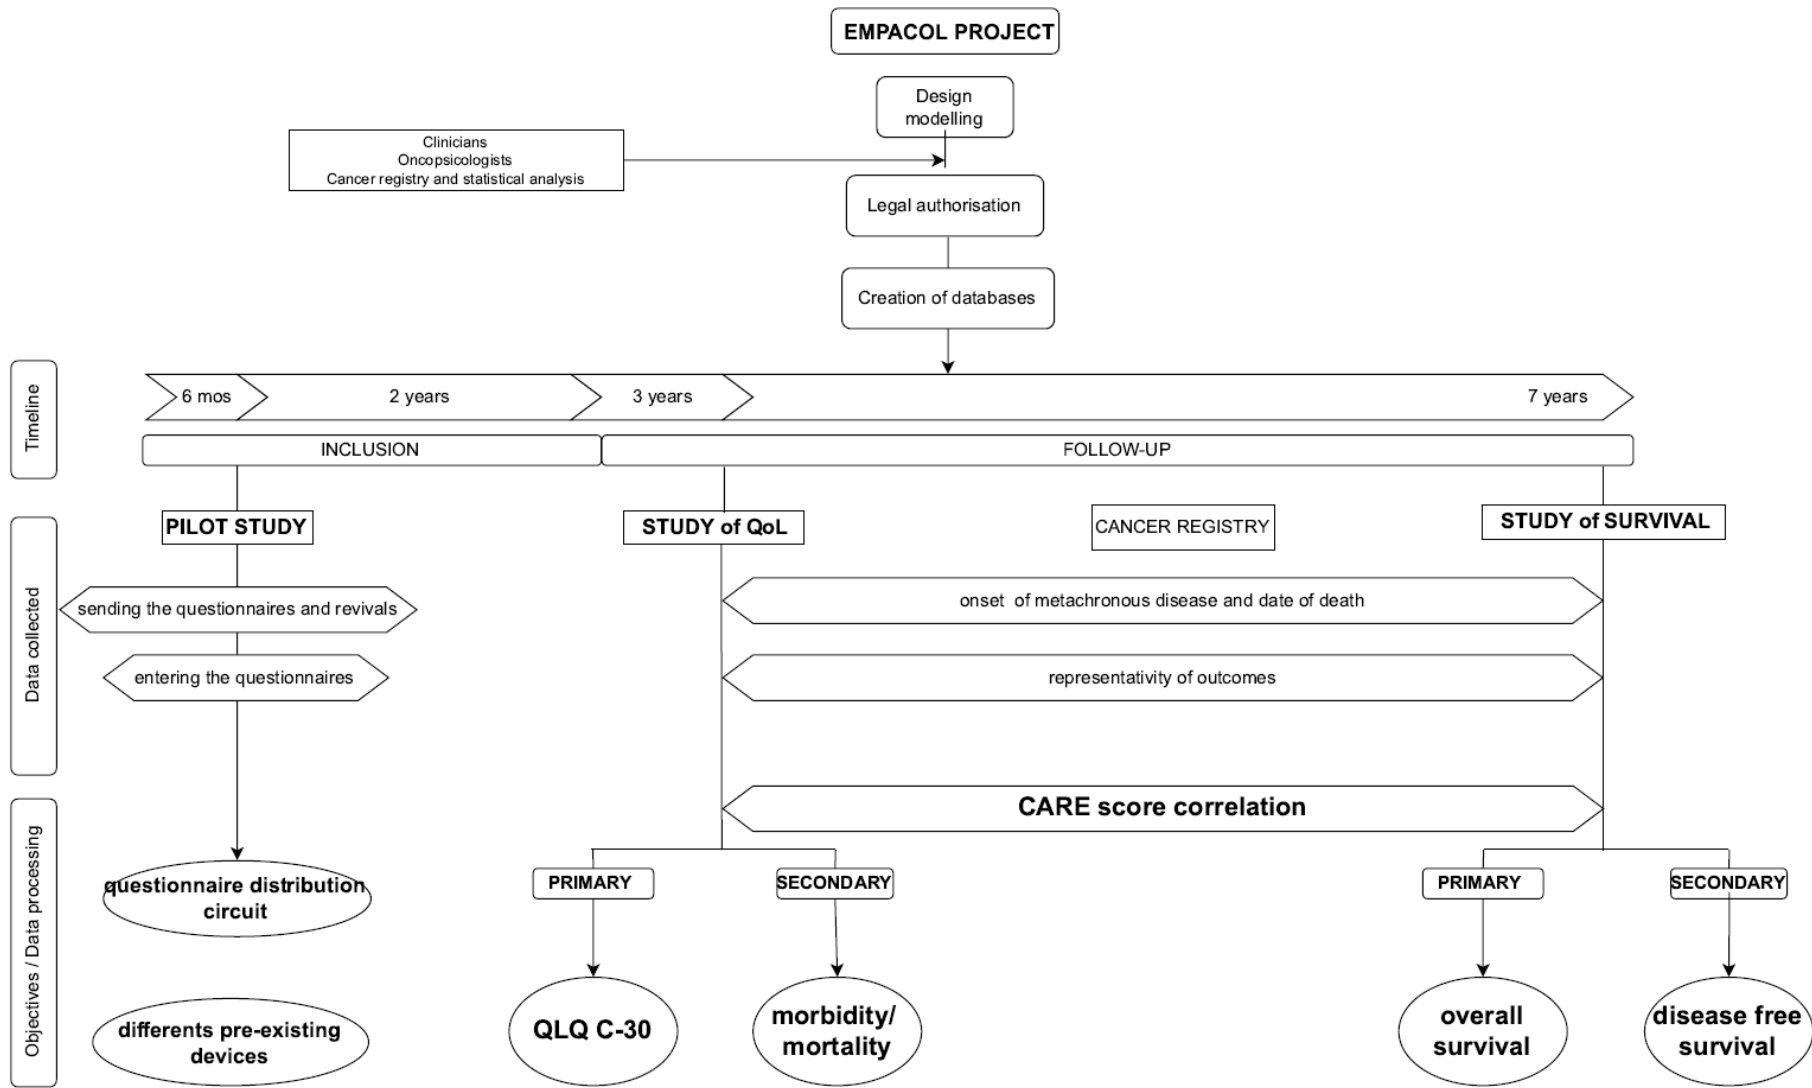

1  
2  
3  
4  
5  
6  
7  
8  
9  
10  
11  
12  
13  
14  
15  
16  
17  
18  
19  
20  
21  
22  
23  
24  
25  
26  
27  
28  
29  
30  
31  
32  
33  
34  
35  
36  
37  
38  
39  
40  
41  
42  
43  
44  
45  
46

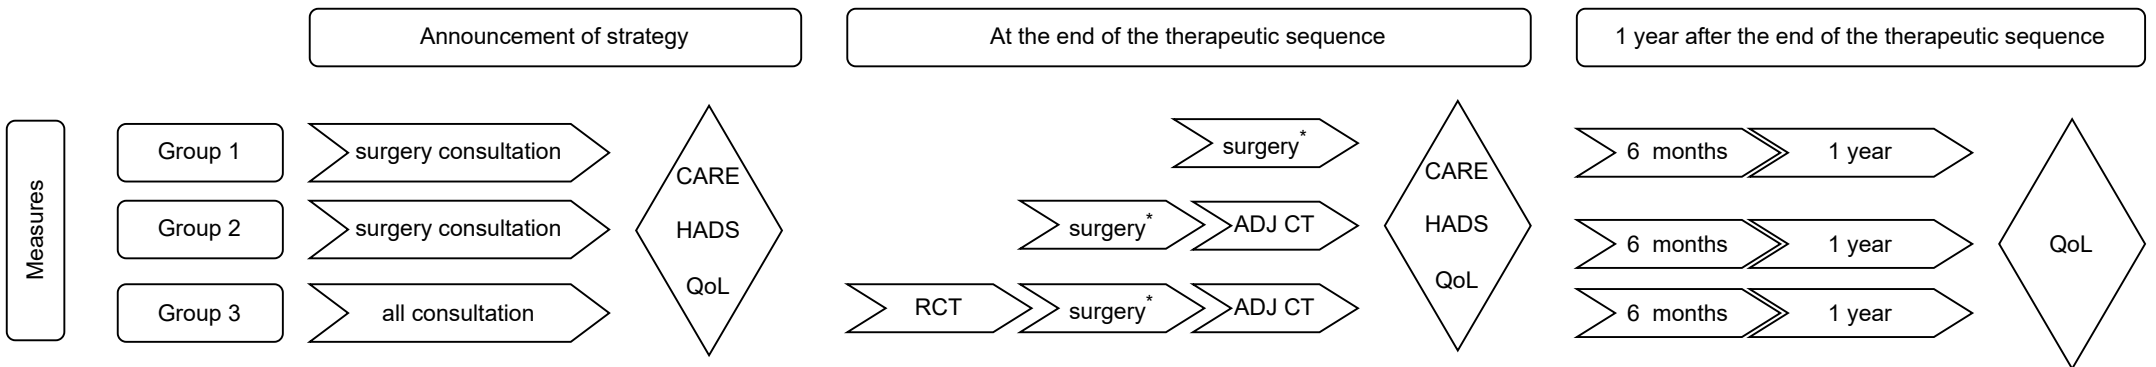

# BMJ Open

## The role of empathy in the outcomes of colorectal cancer: protocol for a population-based study in two areas in France (EMPACOL project)

|                                 |                                                                                                                                                                                                                                                                                                                                                                                                                                                                                                                 |
|---------------------------------|-----------------------------------------------------------------------------------------------------------------------------------------------------------------------------------------------------------------------------------------------------------------------------------------------------------------------------------------------------------------------------------------------------------------------------------------------------------------------------------------------------------------|
| Journal:                        | <i>BMJ Open</i>                                                                                                                                                                                                                                                                                                                                                                                                                                                                                                 |
| Manuscript ID                   | bmjopen-2022-066559.R1                                                                                                                                                                                                                                                                                                                                                                                                                                                                                          |
| Article Type:                   | Protocol                                                                                                                                                                                                                                                                                                                                                                                                                                                                                                        |
| Date Submitted by the Author:   | 24-Oct-2022                                                                                                                                                                                                                                                                                                                                                                                                                                                                                                     |
| Complete List of Authors:       | Mulliri, Andrea; CHU Caen, Lelorain, Sophie; University of Lille, Psychology, Cancer care<br>Bouvier, Véronique; Centre Hospitalier Universitaire de Caen<br>Bara, Simona; CH du Cotentin<br>Gardy, Josephine; Centre Francois Baclesse Centre de Lutte Contre le Cancer<br>Grynberg, Delphine; Université de Lille<br>MORELLO, Rémy; CHU Caen, Unité de biostatistique et recherche clinique<br>Alves, Arnaud; CHU Caen<br>Dejardin , Olivier; Centre Hospitalier Universitaire de Caen, INSERM U1086 Anticipe |
| <b>Primary Subject Heading</b>: | Oncology                                                                                                                                                                                                                                                                                                                                                                                                                                                                                                        |
| Secondary Subject Heading:      | Health services research                                                                                                                                                                                                                                                                                                                                                                                                                                                                                        |
| Keywords:                       | Gastrointestinal tumours < GASTROENTEROLOGY, Quality in health care < HEALTH SERVICES ADMINISTRATION & MANAGEMENT, Colorectal surgery < SURGERY                                                                                                                                                                                                                                                                                                                                                                 |
|                                 |                                                                                                                                                                                                                                                                                                                                                                                                                                                                                                                 |

SCHOLARONE™  
Manuscripts

**The role of empathy in the outcomes of colorectal cancer: protocol for a population-based study in two areas in France (EMPACOL project)**

**Mulliri Andrea**

[dr.andreamulliri@gmail.com](mailto:dr.andreamulliri@gmail.com)

<https://orcid.org/0000-0002-0333-8651>

Department of Digestive Surgery, University Hospital of Caen, Avenue de la Côte de Nacre, CEDEX, 14033 Caen, France.

ANTICIPE U1086 INSERM-UCN, Centre François Baclesse, 14000 Caen, France

**Lelorain. Sophie**

[sophie.lelorain@unil.ch](mailto:sophie.lelorain@unil.ch)

University of Lausanne Switzerland. Center for Research in Health, Aging and Sport Psychology (PHASE).

**Bouvier Véronique**

[veronique.bouvier@unicaen.fr](mailto:veronique.bouvier@unicaen.fr)

ANTICIPE U1086 INSERM-UCN, Centre François Baclesse, 14000 Caen, France

Calvados Digestive Cancer Registry, University Hospital of Caen, 14000 Caen, France

Epidemiology Research and Evaluation Unit, Department of Research, University Hospital of Caen, Avenue de la Côte de Nacre, CEDEX, 14033 Caen, France

**Bara Simona**

[simona.bara@ch-cotentin.fr](mailto:simona.bara@ch-cotentin.fr)

Hospital Center of Contentin, France

**Gardy Josephine**

[josephine.gardy@inserm.fr](mailto:josephine.gardy@inserm.fr)

ANTICIPE U1086 INSERM-UCN, Centre François Baclesse, 14000 Caen, France

Calvados Digestive Cancer Registry, University Hospital of Caen, 14000 Caen, France

**Grynberg Delphine**

[delphine.grynberg@univ-lille.fr](mailto:delphine.grynberg@univ-lille.fr)

CNRS, UMR 9193 - SCALab, University of Lille, France.

**Morello Remy**

[morello-r@chu-caen.fr](mailto:morello-r@chu-caen.fr)

Public Health Unit, University Hospital Center Côte de Nacre, Caen, France

**Alves Arnaud**

[alves-a@chu-caen.fr](mailto:alves-a@chu-caen.fr)

Department of Digestive Surgery, University Hospital of Caen, Avenue de la Côte de Nacre, CEDEX, 14033 Caen, France.

ANTICIPE U1086 INSERM-UCN, Centre François Baclesse, 14000 Caen, France

Calvados Digestive Cancer Registry, University Hospital of Caen, 14000 Caen, France.

**Dejardin Olivier**

[olivier.dejardin@unicaen.fr](mailto:olivier.dejardin@unicaen.fr)

ANTICIPE U1086 INSERM-UCN, Centre François Baclesse, 14000 Caen, France

**Correspondence to:**

Mulliri Andrea

[dr.andreamulliri@gmail.com](mailto:dr.andreamulliri@gmail.com)**Keywords:** empathy, colorectal cancer, treatment, outcomes**ABSTRACT****Introduction**

The EMPACOL project aims to investigate the link between healthcare professionals' (HCPs) empathy and the results of the curative treatment of non-metastatic colorectal cancer (CRC).

**Methods and analysis**

EMPACOL will be an observational multicentric prospective longitudinal study. It will cover eight centers comprising patients with non-metastatic CRC, uncomplicated at diagnosis in two French areas covered by a cancer register over a two-year period. As estimated by the two cancer registries, during the two-year inclusion period, the number of cases of non-metastatic CRCs was approximately 480. With an estimated participation rate of about 50%, we expect around 250 patients will be included in this study. Based on the curative strategy, patients will be divided into three groups: group 1 (surgery alone), group 2 (surgery and adjuvant chemotherapy), and group 3 (neo-adjuvant therapy, surgery and adjuvant chemotherapy). The relationship between HCPs' empathy at the time of announcement and at the end of the strategy, quality of life (QoL) one year after the end of treatment, and oncological outcomes after five years will be investigated. HCPs' empathy and QoL will be assessed using the patient-reported questionnaires, Consultation and Relational Empathy (CARE) and European Organisation for Research and Treatment of Cancer QoL (EORTC QLQ-C30), respectively. A relationship between HCPs' empathy and early outcomes, particularly digestive and genitourinary sequelae, will also be studied for each treatment group. Post-treatment complications will be assessed using the Clavien Dindo classification. Patients' anxiety and depression will also be assessed using the HADS questionnaire.

**Ethics and dissemination**

The Ethics Committee of the University Hospital of Caen and the Ethics Committee (ID RCB: 2022-A00628-35) have approved the study. Patients will be required to provide oral consent for participation. Results of this study will be disseminated by publication in peer-reviewed journals.

**Study registration number**

NCT05447611.

**Strengths and limitations of this study**

- Multicenter and prospective longitudinal design with a multidisciplinary research group to address functional sequelae, socio-territorial inequalities, and empathy, as well as the impact of clinical and non-clinical factors on CRC.
- Supervision of the cancer registry to ensure that the results are representative.
- However, a CARE score threshold is lacking in the literature.
- Additionally, the CARE score does not include an important dimension associated to empathy: the reassurance by HCPs to patients that they will do their very best for them.
- Temporal and spatial heterogeneity between clinical information and questionnaire completion is another limitation.

**INTRODUCTION****Epidemiology of colorectal cancer**

Colorectal cancer (CRC) remains a public health problem. There were an estimated 43,336 new cases of CRC in France in 2018. This makes it, among solid tumors, the third most common cancer in men and the second most common in women. With 17,117 deaths in 2018, CRC is the second leading cause of cancer death in men and the third leading cause of death in women. The prognosis of CRC has improved significantly over the past 20 years[1],[2]. For patients with colon cancer (CC), a five-year survival rate ranges from 92% for stage I to 11% for stage IV. The multidisciplinary strategy for rectal cancer (RC) has been shown to reduce the five-year local recurrence rate to less than 10%, and increase the five-year overall survival (OS) rate beyond 50%[3].

**Colorectal cancer management**

1  
2  
3 Although the term “colorectal cancer” is commonly used, both multimodal treatment and  
4 functional sequelae are not the same for colon and rectal cancer[4]. For forms that are neither  
5 metastatic nor locally complicated (non-hemorrhagic, without occlusion or perforation) at the  
6 time of diagnosis, surgical oncologic resection (colectomy or proctectomy) represents the  
7 cornerstone of treatment with curative intent[5]. As suggested by recent French guidelines[6],  
8 surgery is preceded by neo-adjuvant treatment for locally advanced subperitoneal RC. Adjuvant  
9 chemotherapy (ADJ CT) is recommended in case of lymph node involvement (stage III) or  
10 vascular/lymphatic invasion, peri-nerve, or tumor budding. The short-term outcome of surgical  
11 resection is generally reported by mortality rates and morbidity using the Dindo-Classification  
12 score assessed on the 90th postoperative day[7]. Since the 2000s, the three-month mortality of  
13 CRC patients, regardless of surgical treatment, has decreased significantly, from 15.8% to  
14 11.3%[8].

15 Both OS and recurrence-free survival are usually the parameters for assessing long-term  
16 oncological outcomes. Although OS has increased significantly over time in all European  
17 regions[9], the five-year OS rate for both CC and RC depends on lymph node status (N) and  
18 cancer stage (T)[10].

19 Due to the significant improvement in prognosis, the functional dimension of CRC treatment  
20 has now become inseparable from carcinologic imperatives[11]. Historically, functional  
21 sequelae have long been considered inherent to the carcinologic nature of the surgical resection  
22 and are hardly avoidable. While prevalence and predictive factors are different depending on  
23 colonic or rectal location[12], functional sequelae (i.e., digestive and/or genitourinary sequelae)  
24 may significantly impair their quality of life (QoL).

### 25 **Quality of life**

26 While QoL remains a priority among CRC treatment outcomes, as outlined in Axis 2 of the  
27 latest 10-year strategy 2021-2030 PLAN CANCER FRANCE, little is known regarding the  
28

1  
2  
3 evolution of QoL over time in patients operated on for CRC[13]. Most QoL scores drop  
4  
5 significantly in the early postoperative period. Surgery, especially total mesorectal excision in  
6  
7 RC, significantly reduced patients' QoL[12]. Of all digestive cancer removals, proctectomy for  
8  
9 RC carries the greatest risk of functional sequelae and impaired QoL.

10  
11  
12 Among the functional sequelae observed, the definitive stoma in case of abdominoperineal  
13  
14 excision and digestive sequelae in sphincter conservation represent the two main risk factors  
15  
16 that potentially alter QoL.

17  
18  
19 Globally, CC patients have less disabling outcomes compared to patients who have undergone  
20  
21 RC surgery[4]. Many side effects are reported in case of ADJ CT. Some toxicities persist after  
22  
23 discontinuation of treatment, which may result in changes in patients' QoL.

### 24 25 26 **Role of empathy in care**

27  
28 In human sciences and even clinical settings, the precise definition of empathy is a subject of  
29  
30 ongoing academic debate[14–16]. Empathy is often considered one-dimensional, but recent  
31  
32 work has demonstrated that a multidimensional view of the concept is also conceivable in  
33  
34 oncology[17,18]. Empathy is considered essential for the building and continuation of the  
35  
36 therapeutic patient-healthcare professional (HCP) relationship.

37  
38 In a clinical setting, empathy involves an ability to[19]:

- 39  
40 -understand the patient's situation, perspective, and feelings
- 41  
42 -communicate this understanding and verify its accuracy
- 43  
44 -act on this understanding with the patient in a helpful way (joint planning of an optimal  
45  
46 therapeutic strategy).

47  
48  
49 A systematic literature review suggested a positive association between HCPs' empathy and a  
50  
51 variety of positive cancer patient outcomes[20], including increased satisfaction with care and  
52  
53 treatment adherence, decreased psychological distress, and improved QoL. Patient perception  
54  
55  
56  
57  
58  
59  
60



1  
2  
3 of physician empathy is largely explained by patient and clinical variables[21]. Unmet patient  
4 needs are strongly and negatively associated with low perceived empathy.  
5  
6

7  
8 Empathy must be evaluated during several key moments of the care pathway to study the  
9  
10 trajectories of perceived empathy and link between these trajectories and the outcomes of  
11  
12 interest. For example, patients with CRC requiring first-line CT present with major concerns at  
13  
14 the time of the CT education session as compared to patients with other tumor forms[22].  
15  
16

17 The sole retrospective study, that examined the link between empathy and survival in oncology,  
18  
19 found discordant results, depending on when empathy was assessed[23].  
20  
21

22 To the best of our knowledge, no prospective study has specifically examined the relationship  
23  
24 between patient-perceived empathy at each stage of a treatment sequence and CRC outcomes.  
25  
26

### 27 **Hypothesis and objectives**

28 The main objective of the EMPACOL project is to investigate, in non-metastatic CRC patients,  
29  
30 a possible correlation between patients' perception of HCPs' empathy and survival (OS and  
31  
32 disease-free survival, DFS).  
33  
34

35 The secondary objective of this study is to evaluate the relationship between patients'  
36  
37 perception of HCPs' empathy and QoL and morbidity and mortality in patients treated for  
38  
39 curative non-metastatic CRC.  
40  
41

42 We expect to find a negative correlation between HCPs' perceived empathy and  
43  
44 morbidity/mortality and a positive correlation between empathy and an improvement in both  
45  
46 functional outcome and QoL one year after treatment.  
47  
48

49 Additionally, we seek to verify if a positive correlation exists between patients' perceived  
50  
51 empathy and survival rate (OS, DFS) five years after completion of treatment received.  
52  
53

## 54 **METHODS AND ANALYSIS**

### 55 **Study design**

56  
57  
58  
59  
60

1  
2  
3 EMPACOL is a descriptive, longitudinal, and multicenter prospective project in two French  
4 areas covered by a cancer registry. The project was approved by the French committee for the  
5 protection of persons (CPP; n° RCB: 2022-A00628-35).  
6  
7

8  
9 All investigators will conduct this study in accordance with the Declaration of Helsinki.  
10

11  
12 Eight CRC centers, including both university hospitals and cancer centers, have agreed to  
13 include 50 to 100 patients who will receive curative treatment between 01/01/2023 and  
14 01/01/2025, with the aim of conducting and reporting multicenter studies on the theme of  
15 patients' perception of HCPs' empathy, QoL, and survival.  
16  
17

18  
19 Taking into consideration clinical factors, EMPACOL will evaluate, among non-clinical  
20 factors, using the CARE questionnaire, the impact of patient-perceived empathy on short-term  
21 (medical-surgical morbidity of each therapeutic step) and long-term outcomes (QoL, DFS and  
22 OS). (fig. 1).  
23  
24

25  
26 To anticipate and respond to the questions and issues that will be encountered in the EMPACOL  
27 project and future studies, we plan to design a prospective multicenter pilot study (fig. 2). This  
28 pilot study will be integrated into the EMPACOL project.  
29  
30

31  
32 Patients will be included prospectively over a six month period. The pilot study aims to find a  
33 link between the circuit of the questionnaire adopted by the center and the response rate to the  
34 questionnaires. Factors that may influence the response rate will also be assessed.  
35  
36

37  
38 The proposed questionnaire circuit hypothesizes that the patients of groups 1 and 2 will evaluate  
39 patients' perception of HCPs' empathy after the surgical consultation and patients of group 3  
40 will evaluate patients' perception of HCPs' empathy once the patient has met the medical and  
41 paramedical team (oncologist, radiotherapist, and surgeon) or once the therapeutic sequence  
42 has been validated through a multidisciplinary consultation (MDC). A subsequent measurement  
43 of patients' perception of HCPs' empathy will be carried out at the end of the therapeutic  
44 sequence. Each assessment of patients' perception of HCPs' empathy will be associated with  
45  
46  
47  
48  
49  
50  
51  
52  
53  
54  
55  
56  
57  
58  
59  
60

1  
2  
3 an assessment of the patient's state of anxiety and depression using the Hospital Anxiety and  
4 Depression Scale (HADS) (fig. 3).  
5  
6

7 We expect member centers to indicate when the proposed procedure will pose difficulties in  
8 terms of filling, delivery, or collection of patient-reported questionnaires to optimize and  
9 streamline the following stages of the EMPACOL project.  
10  
11  
12

13 For the three therapeutic groups, QoL and patients' perception of HCPs' empathy will be  
14 simultaneously evaluated at the time of announcing the strategy. The QoL will be reassessed  
15 on the 90th postoperative day for group 1 and at the end of the ADJ CT for groups 2 and 3.  
16  
17  
18  
19  
20  
21  
22  
23  
24  
25  
26  
27  
28  
29  
30  
31  
32  
33  
34  
35  
36  
37  
38  
39  
40  
41  
42  
43  
44  
45  
46  
47  
48  
49  
50  
51  
52  
53  
54  
55  
56  
57  
58  
59  
60  
Regardless of the therapeutic group, the QoL will be reassessed at six months and one year after  
the end of treatment (fig. 3). We will examine the link between patients' perception of HCPs'  
empathy and five-year OS and the occurrence of local recurrence or metastatic pathology  
(disease free survival; primary objective). Moreover, we will study the link between patients'  
perception of HCPs' empathy and post operative morbidity/mortality and QoL (secondary  
objective).

Morbidity/mortality will be evaluated at the end of the therapeutic strategy. The most severe  
complication will be considered in the analyses (fig. 2). The disease will be considered as  
metachronous in case of tumor recurrence occurring six months after the diagnosis.

### **Inclusion criteria**

The inclusion criteria will be as follows: patients aged 18 to 80 years, who are French speaking,  
who are affiliated to a social security system, and who have received a detailed description of  
the study. Furthermore, the patients must be diagnosed with non-metastatic and uncomplicated  
CRC (without occlusion/perforation/bleeding), require elective therapeutic management, and  
not have expressed an unfavorable opinion to participate. The participants must provide their  
oral consent at the time of consultation, where the proposed treatment strategy will be detailed,  
along with the delivery of questionnaires.

1  
2  
3 Written consent will not be required from participants (non-interventional research – NIR/MR-  
4  
5 003 - Declaration number 2011519 V0). We will include patients who have a cognitive state  
6  
7 capable of understanding and completing the questionnaires (autonomous completion).  
8  
9

### 10 **Exclusion criteria**

11  
12 We will exclude patients who are minors or older than 80 years, residing in a department outside  
13  
14 Calvados or Manche, presenting with a CRC other than adenocarcinoma and all metastatic  
15  
16 forms or requiring emergency surgery (perforation, hemorrhage, occlusion), undergoing  
17  
18 exclusive endoscopic treatment, or with a missed-CRC discovered after surgery for non-  
19  
20 oncological indications.  
21  
22

23  
24 Additionally, we will exclude patients with another neoplastic disease under treatment and/or  
25  
26 evolving, a history of inflammatory bowel disease (Crohn's disease, ulcerative colitis),  
27  
28 hereditary diseases predisposing to CRC (Lynch syndrome, familial polyposis), and severe  
29  
30 cognitive impairment preventing proper comprehension of the questionnaires. Furthermore,  
31  
32 pregnant women will be excluded.  
33  
34

### 35 **Endpoints and measures**

#### 36 **Empathy**

37  
38 Patient-perceived empathy will be assessed using the Consultation and Relational Empathy  
39  
40 (CARE) questionnaire that has been validated in cancer care[17]. This is a self-reported 10-  
41  
42 point questionnaire with a five-point Likert-type scale ranging from “poor” to “excellent.” It  
43  
44 has excellent psychometric properties with  $\alpha = 0.92$ . High scores indicate a higher perception  
45  
46 of HCPs' empathy. Three distinct empathic processes will also be considered: “rapport” (items  
47  
48 1-3), “emotional process” (items 4-6), and “cognitive process” (items 7-10).  
49  
50  
51  
52  
53

#### 54 **Quality of life**

55  
56 QoL will be evaluated using the EORTC-QLQ-C30, which is equivalent to other tools, such as  
57  
58 the GIQLI (Gastrointestinal Quality of Life Index), in terms of emotional function, but  
59  
60

1  
2  
3 superior in terms of social function[24]. The use of an additional tool is recommended for the  
4  
5 assessment of depression in CRC patients[25].  
6

### 7 **Patient anxiety and depression**

8  
9  
10 This parameter will be evaluated with the HADS[26]. The HADS assesses both symptoms of  
11  
12 anxiety and depression, which commonly coexist.  
13

### 14 **Morbidity and mortality**

15  
16  
17 The severity of medical and surgical complications will be assessed using the Clavien-Dindo  
18  
19 grading system[7]. Grade I and II complications involve only pharmacological treatment, while  
20  
21 grades III, IV, and V require surgical, endoscopic, or radiological treatment. Complications  
22  
23 below grade III will be considered “minor complications,” while complications above and  
24  
25 including grade III will be considered “major complications,” as reported in the literature. For  
26  
27 the three groups, postoperative morbidity and mortality will be assessed at 90 postoperative  
28  
29 days (C/D90). C/D90 will be associated with the morbidity and mortality of the other  
30  
31 therapeutic stages, post adjuvant treatment for group 2 (C/DADJ), and post neoadjuvant  
32  
33 treatment (C/DNEOADJ) for group 3; it will also be associated with C/DADJ.  
34  
35  
36

### 37 **Survival and representativeness of the data collected**

38  
39  
40 All patients diagnosed with CRC during the inclusion period will be included in two specialized  
41  
42 digestive cancer registries of North-West France, members of the French network of cancer  
43  
44 registries (FRANCIM), departments of Calvados and Manche. The resident population of these  
45  
46 well-defined administrative areas was 1,601,928 inhabitants in 2016. Both digestive cancer  
47  
48 registries included in the present study have collected exhaustive information on treatments and  
49  
50 stage in the framework of the high-resolution study. These registries have worked together for  
51  
52 many years and use identical standardized data collection, recording, and validation procedures.  
53  
54  
55 Multiple information sources ensure exhaustive collection of study variables. The databases are  
56  
57  
58 declared to the National Commission on Information Technology and Civil Liberties (CNIL).  
59  
60

1  
2  
3 The quality of the data collected is evaluated every four years by Institut National de la Santé  
4 et de la Recherche Médicale (INSERM), “Santé Publique France,” and Institut National du  
5  
6  
7  
8 Cancer (INCa).  
9

### 10 **Data collection**

11  
12 Socio-demographic and medical information will include gender, age (<60 years, 60–69 years,  
13  
14 70–75 years), education level, marital status, obesity (BMI > 30), active smoking and alcohol  
15  
16 use, the American Society of Anesthesiologists (ASA) physical status classification system (I-  
17  
18 II versus III-IV), anxious and depressive states (HADS score) of the patient and presentation  
19  
20 during the multidisciplinary team meeting, histology and tumor differentiation (grades I, II, and  
21  
22 III), surgical approach (laparotomy and/or laparoscopy or robotic), neoadjuvant or adjuvant  
23  
24 treatments (type and number of sessions), and site of the primary tumor (colon vs rectum). The  
25  
26 forms located at the rectosigmoid junction will be included in the colonic localizations.  
27  
28

29  
30 Socioeconomic status will be defined using the European Deprivation Index (EDI), which is an  
31  
32 ecological and composite indicator included in the census of the European Union’s statistics on  
33  
34 income and living conditions. For all cases, patient addresses will be geolocalized using the  
35  
36 geographic information system (ArcGIS 10.2) and assigned to an “Ilots Regroupés pour  
37  
38 L'Information Statistique” (IRIS), a geographic area defined by the “Institut National de la  
39  
40 Statistique et des Études Économiques” (INSEE). IRIS is the smallest geographical unit in  
41  
42 France, for which census data are available.  
43  
44  
45

### 46 **Statistical analysis**

47  
48 Quantitative variables will be expressed as mean  $\pm$  SD, and qualitative variables will be  
49  
50 expressed as number of patients and percentages. Regardless of the therapeutic group, the  
51  
52 experimental design of the study allows for several measurements to be performed in the same  
53  
54 individual during their oncological care and follow-up. Comparisons between the mean scores  
55  
56 of the three treatment groups will be made using an analysis of variance (ANOVA) or a  
57  
58  
59  
60

1  
2  
3 Kruskal-Wallis test, depending on whether the data follow the hypothesis of tested  
4 homoscedasticity. Post hoc comparisons will be performed with the Bonferroni correction or  
5 Nemenyi test.  
6  
7  
8

9  
10 The sensitivity and specificity of the CARE score in predicting impact on QoL will be assessed  
11 by receiver operating characteristic curves for the score versus groups reporting no/minor or  
12 definite/major impact on QoL.  
13  
14

15  
16 The correlation between the validated CARE questionnaire and the QLQ questionnaire  
17 (EORTC's QLQ-C30) will be estimated with Pearson's and Spearman's correlation coefficients  
18 and their 95% CI.  
19  
20  
21

22  
23 The inclusion of data indicating the impact of CARE on QoL will be based on a univariate  
24 approach and then a multivariate approach using ad hoc models depending on the nature of the  
25 dependent variable (binary or multi-nomial logistic regression or linear regression depending  
26 on whether the QoL score is considered qualitative or quantitative). Only variables with  $p \leq$   
27 0.20 in the univariate analysis will be included in the multivariate model. This approach will  
28 allow the identification of risk factors related to the deterioration of QoL and assessment of  
29 their impact. All tests will be two-tailed with a significance level ( $p$ ) equal to 0.05.  
30  
31  
32

33  
34 We will use the Kaplan-Meier method to obtain survival curves and a Cox model to assess the  
35 impact of CARE score on survival in the three different groups. Hazard ratios (HRs) will be  
36 calculated, using semi-proportional Cox hazard models, to assess the effect of the CARE score  
37 on survival in patients with nonmetastatic, uncomplicated CRC. The proportional hazard  
38 hypothesis will be tested (Schoenfeld's residuals). Variables whose threshold  $p$ -value is  $\leq 0.20$   
39 in the univariate analysis (M0) will be included in the multivariate model (M1). The variable  
40 of interest (CARE score) will be used in all models.  
41  
42  
43  
44  
45  
46  
47  
48  
49  
50  
51  
52  
53

54  
55 All statistical analyses will be performed using StataSE14 (StataCorp LLC, College Station,  
56 Texas, USA).  
57  
58  
59  
60

## Feasibility

We chose to include patients who had undergone curative treatment over a two-year period for two reasons: the first is physiological, to allow their bowel function to become stable. The second is oncological, to detect local recurrence and/or distant metastases. Consistent with recent literature, we considered differentiating the study population into two groups: those with high perceived empathy (maximum CARE score, which is often the modal value in cancer care) and those without.

We calculated with BiostaTGV that approximately 90 patients in each group, thus 180 in total, would be needed to show clinically significant improvement in QoL or reduction in morbidity with high CARE score (power  $\beta$  80% and risk  $\alpha$  0.05 bilaterally).

From the two cancer registries, we know that over the two-year inclusion period, the number of nonmetastatic CRCs is approximately 480 cases. With an estimated participation rate of about 50%, we expect around 250 patients will be included in this study.

## Patient and public involvement

Patients and the public have not been involved in the design, recruitment or conduct of the study. The results will be disseminated to study participants and to the physicians who included them in the study.

## ETHICS AND DISSEMINATION

The institutional review board of the University Hospital of Caen and the ethics committee (CPP Nord Ouest I, June 2022; n° ID RCB: 2022-A00628-35) have approved the study.

Patients will be informed orally (according to non-interventional research - NIR MR-003 - Declaration number 2011519 V0) of the purpose of the research and the course and duration of the study and will provide oral consent. They will be able to exercise their right to withdraw at



1  
2  
3 any time. The medical procedures of this study are in accordance with the recommendations of  
4 the Declaration of Helsinki and the law n°2012-300 of March 5, 2012, and its application decree  
5 n° 2016-1537 of November 16, 2016. In accordance with the Data Protection Act and Law No.  
6  
7  
8  
9  
10 2002-303 of March 4, 2002, the patient may exercise their right to access and rectify the data  
11 collected at any time.  
12

13  
14 Any modification of the protocol will have to be approved by the CPP. The automated  
15 processing of health data complies with the European Regulation of April 27, 2016, on the  
16 protection of individuals with regard to the processing of personal data and on the free  
17 movement of such data. The coordinating investigator of the study undertakes to keep the  
18 source documents for a period of 15 years.  
19

20  
21 Results of this study will be disseminated by publication in peer-reviewed professional and  
22 scientific journals. Participant data will be kept confidential and will not be shared with the  
23 public. If there are requests for data sharing for appropriate research purposes, this will be  
24 considered on an individual basis after study completion and after the publication of the primary  
25 manuscripts.  
26  
27  
28  
29  
30  
31  
32  
33  
34  
35  
36  
37  
38  
39

## 40 **DISCUSSION**

41  
42 The prognosis of CRC has improved significantly over the past 20 years[1],[2]. Oncological  
43 principles[27], the development of minimally invasive techniques[28], and advances in  
44 diagnostic accuracy[29] are strongly linked to these outcomes and well described in the recent  
45 literature. However, many surviving patients experience functional sequelae (i.e., digestive  
46 and/or genitourinary sequelae) that significantly impair their QoL. Both prevalence and  
47 predictive factors are different depending on colonic or rectal location[12].  
48

49  
50 Functional disorders occur frequently following surgery for CC. The incontinence of liquid and  
51 solid stool is 24.1% and 6.9%, respectively. The most common symptoms associated with  
52  
53  
54  
55  
56  
57  
58  
59  
60

1  
2  
3 constipation is incomplete and difficult evacuation in about one-third of cases[4]. Major low  
4  
5 anterior resection syndrome (LARS) is present in 21.1% of patients[4]. No difference is  
6  
7 reported in the prevalence of symptoms according to the type of colectomy[4][12]. In their  
8  
9 systematic review and meta-analysis, Verkuijl et al. included 8418 partial colectomies (4207  
10  
11 right hemicolectomies and 4211 left hemicolectomies/sigmoid colon resection, respectively)  
12  
13 and 161 subtotal/total colectomies and concluded that bowel function problems following CC  
14  
15 surgery are common, do not improve over time, and are not dependent on the type of surgery[4].  
16  
17 For RC, low rectal resections[30] and neoadjuvant radiotherapy[31] are known to severely  
18  
19 impair bowel function. Up to 80% of patients with RC undergo sphincter-preserving  
20  
21 surgery[32], without impairing oncological prognosis[6][33]. Between 50% and 90% of these  
22  
23 patients will experience a change in their bowel habits afterwards[34][35]. Eid et al. found that  
24  
25 65.2% of RC survivors had bowel dysfunction, including 41.3% with major LARS and 80%  
26  
27 with genitourinary dysfunction[12]. In addition to the psychological burden related to the tumor  
28  
29 pathology and concern about the probability of recovery, it is important to consider the patient's  
30  
31 experience of the functional results and its repercussions in terms of QoL, especially in case of  
32  
33 complications or poor functional results. One of the worst fears related to surgery is the creation  
34  
35 of an ostomy.  
36  
37

38  
39 Problems related to stoma care, or impaired genitourinary or digestive function are likely to  
40  
41 have an impact on the QoL of CRC patients.  
42  
43

44  
45 Patients' perceived unmet rehabilitation needs during the course of their tumor pathology are  
46  
47 associated with decreased QoL. Interventions to reduce cancer patients' perceived rehabilitation  
48  
49 needs may improve QoL.  
50  
51

52  
53 Among non-medical factors, other than socioeconomic and geographic inequalities, rural  
54  
55 ostomy patients reported more care-related problems and lower QoL[36].  
56  
57  
58  
59  
60

1  
2  
3 A 2012 review of the literature suggested links between HCPs' empathy and various positive  
4 cancer patient outcomes, such as improved QOL or increased satisfaction with care[20].  
5  
6 Assessment modalities for measuring empathy in medical settings are heterogeneous[20].  
7  
8

9  
10 The associations between the severity of medical and surgical complications and the perception  
11 of surgeon empathy has been studied in esophageal and gastric cancer patients[18]. When  
12 patients perceived high empathy, they were less likely to report major complications[18]. Of  
13 the three dimensions, "rapport building" and "emotional process" were predictive of major  
14 complications. Physician empathy is essential before surgery. It is therefore important to  
15 consider the patient's experience.  
16  
17

18  
19 Thanks to the CARE tool, the EMPACOL project will allow us to evaluate patients' perceptions  
20 of medical and paramedical staffs' empathy throughout their care, particularly in the case of  
21 complications related to the treatment and its impact in terms of early and late results.  
22  
23

24  
25 HCPs need to be trained to establish a good relationship with patients, from the time of  
26 treatment announcement through the period of oncological surveillance. Further research is  
27 needed to understand the mechanisms linking empathy to CRC management outcomes.  
28  
29

30  
31 To this end, this pilot study will allow us to identify the best channel for distributing the  
32 questionnaires, study the clinical and non-clinical factors that may influence respondent and  
33 non-respondent rates, and identify a correlation with short-term outcomes in each therapeutic  
34 group.  
35  
36

37  
38 The strengths of the project include:  
39  
40

41  
42 1) it is the first project to study a correlation between empathy and survival in an oncology  
43 setting, using a score translated and validated in the French language ; 2) the multicenter,  
44 prospective, and longitudinal design makes this a comprehensive study to evaluate empathy  
45 and survival in patients with CRC; 3) the multi-disciplinarity of the research group addresses  
46 functional sequelae, socio-territorial inequalities, and empathy and evaluates the impact of  
47  
48  
49  
50  
51  
52  
53  
54  
55  
56  
57  
58  
59  
60

1  
2  
3 clinical and non-clinical factors in CRC; 4) the cancer registry will ensure the  
4  
5 representativeness of the results.  
6

7  
8 However, the limitations of the project include:  
9

10 1) the lack of a CARE score threshold in the literature; 2) the temporal and spatial heterogeneity  
11  
12 between clinical information and questionnaire completion; 3) the absence of a specific  
13  
14 assessment of the patient's experience with uncertainty and negative events during  
15  
16 management, such as tumor progression or treatment-related complications, in the CARE score.  
17  
18 The results of the pilot study will therefore help refine the methodological tools that will be  
19  
20 used in the EMPACOL project, which aims to find a correlation between the CARE score and  
21  
22 long-term outcomes (QoL and survival). The representativeness of the data collected and results  
23  
24 of the EMPACOL project will be studied under the supervision of the cancer registries that  
25  
26 cover the two departments considered for patient inclusion.  
27  
28

29  
30 Repeated measurements of perceived empathy, in relation to the treatment received, in the same  
31  
32 individual and a follow-up of their evolution over time will make it possible to understand how  
33  
34 to facilitate learning, encourage its practice in daily clinical attitudes, and promote the  
35  
36 development of empathy in the training of all actors in the caregiver-patient relationship.  
37  
38 Obtaining and validating an empathy score, thanks to future studies, will allow a better  
39  
40 appreciation of the role of all non-clinical factors in the results in the oncological environment  
41  
42 and will open the way to other typologies of cancer.  
43  
44  
45

46  
47 This project is original as it goes beyond the impact of clinical factors in the outcomes of  
48  
49 curative treatment of CRC. The multidisciplinary collaboration and cross-cutting competencies  
50  
51 within our research group, functional sequelae, socio-territorial inequalities, and empathy will  
52  
53 help us better understand the impact of non-medical factors and role of empathy in the curative  
54  
55 treatment of CRC. The prospective and longitudinal nature of this project will allow us to  
56  
57 comment on the representativeness of the data collected and results obtained.  
58  
59  
60

1  
2  
3  
4  
5  
6  
7  
8  
9  
10  
11  
12  
13  
14  
15  
16  
17  
18  
19  
20  
21  
22  
23  
24  
25  
26  
27  
28  
29  
30  
31  
32  
33  
34  
35  
36  
37  
38  
39  
40  
41  
42  
43  
44  
45  
46  
47  
48  
49  
50  
51  
52  
53  
54  
55  
56  
57  
58  
59  
60

\*\* \*\* \*

### Contributors

Study conception and design: AM, SL, DG, OD. Intervention design: SL, VB, SB, JG, DG, RM, AA et AM. Analysis of data will be done by AM, OD and RM. AM drafted the work, which was revised critically for intellectual content by SL and DG. All authors gave final approval of this version to be published.

### Funding

None.

### Competing interests

None declared.

### REFERENCES

1. Ferlay, J. *et al.* Cancer incidence and mortality patterns in Europe: estimates for 40 countries in 2012. *Eur J Cancer* **49**, 1374–1403 (2013).
2. Siegel, R. L. *et al.* Colorectal cancer statistics, 2017. *CA Cancer J Clin* **67**, 177–193 (2017).
3. Cottet, V. *et al.* Incidence and patterns of late recurrences in rectal cancer patients. *Ann Surg Oncol* **22**, 520–527 (2015).
4. Verkuijl, S. J. *et al.* Functional outcomes of surgery for colon cancer: a systematic review and meta-analysis. *Eur J Surg Oncol* **47**, 960–969 (2021).
5. Labianca, R. *et al.* Primary colon cancer: ESMO Clinical Practice Guidelines for diagnosis, adjuvant treatment and follow-up. *Ann Oncol* **21 Suppl 5**, v70-77 (2010).
6. Lakkis, Z. *et al.* Management of rectal cancer: the 2016 French guidelines. *Colorectal Dis* **19**, 115–122 (2017).
7. Clavien, P. A. *et al.* The Clavien-Dindo classification of surgical complications: five-year experience. *Ann Surg* **250**, 187–196 (2009).

- 1  
2  
3 8. Iversen, L. H., Ingeholm, P., Gögenur, I. & Laurberg, S. Major reduction in 30-day  
4 mortality after elective colorectal cancer surgery: a nationwide population-based study in  
5 Denmark 2001–2011. *Ann Surg Oncol* **21**, 2267–2273 (2014).  
6  
7
- 8 9. Brenner, H. *et al.* Progress in colorectal cancer survival in Europe from the late 1980s to  
9 the early 21st century: the EURO CARE study. *International Journal of Cancer* **131**, 1649–  
10 1658 (2012).  
11
- 12 10. Gunderson, L. L., Jessup, J. M., Sargent, D. J., Greene, F. L. & Stewart, A. K. Revised  
13 TN categorization for colon cancer based on national survival outcomes data. *J Clin Oncol*  
14 **28**, 264–271 (2010).  
15
- 16 11. Alves, A. [Recommendations for clinical practice. Therapeutic choices for rectal cancer.  
17 How can we reduce therapeutic sequelae and preserve quality of life?]. *Gastroenterol Clin*  
18 *Biol* **31 Spec No 1**, 1S52-62, 1S95-97 (2007).  
19
- 20 12. Eid, Y. *et al.* Digestive and genitourinary sequelae in rectal cancer survivors and their  
21 impact on health-related quality of life: outcome of a high-resolution population-based  
22 study. *Surgery* **166**, 327–335 (2019).  
23
- 24 13. Schmidt, C. E., Bestmann, B., Kuchler, T., Longo, W. E. & Kremer, B. Impact of age on  
25 quality of life in patients with rectal cancer. *World J Surg* **29**, 190–197 (2005).  
26
- 27 14. Hall, J. A. *et al.* What is clinical empathy? Perspectives of community members,  
28 university students, cancer patients, and physicians. *Patient Educ Couns* **104**, 1237–1245  
29 (2021).  
30
- 31 15. Sanders, J. J. *et al.* What is empathy? Oncology patient perspectives on empathic clinician  
32 behaviors. *Cancer* **127**, 4258–4265 (2021).  
33
- 34 16. Håkansson Eklund, J. & Summer Meranius, M. Toward a consensus on the nature of  
35 empathy: a review of reviews. *Patient Educ Couns* **104**, 300–307 (2021).  
36  
37  
38  
39  
40  
41  
42  
43  
44  
45  
46  
47  
48  
49  
50  
51  
52  
53  
54  
55  
56  
57  
58  
59  
60

- 1  
2  
3 17. Gehenne, L. *et al.* Testing two competitive models of empathic communication in cancer  
4 care encounters: a factorial analysis of the CARE measure. *Eur J Cancer Care (Engl)* **29**,  
5 e13306 (2020).  
6  
7  
8  
9  
10 18. Gehenne, L. *et al.* Associations between the severity of medical and surgical  
11 complications and perception of surgeon empathy in esophageal and gastric cancer  
12 patients. *Support Care Cancer* (2021) doi:10.1007/s00520-021-06257-y.  
13  
14  
15  
16 19. Mercer, S. W. & Reynolds, W. J. Empathy and quality of care. *Br J Gen Pract* **52 Suppl**,  
17 S9-12 (2002).  
18  
19  
20  
21 20. Lelorain, S., Brédart, A., Dolbeault, S. & Sultan, S. A systematic review of the  
22 associations between empathy measures and patient outcomes in cancer care.  
23 *Psychooncology* **21**, 1255–1264 (2012).  
24  
25  
26  
27 21. Lelorain, S. *et al.* How does a physician's accurate understanding of a cancer patient's  
28 unmet needs contribute to patient perception of physician empathy? *Patient Educ Couns*  
29 **98**, 734–741 (2015).  
30  
31  
32  
33 22. Oguchi, M. *et al.* Measuring the impact of nurse cue-response behaviour on cancer  
34 patients' emotional cues. *Patient Educ Couns* **82**, 163–168 (2011).  
35  
36  
37  
38 23. Lelorain, S., Cortot, A., Christophe, V., Pinçon, C. & Gidron, Y. Physician empathy  
39 interacts with breaking bad news in predicting lung cancer and pleural mesothelioma  
40 patient survival: timing may be crucial. *J Clin Med* **7**, E364 (2018).  
41  
42  
43  
44 24. Schwenk, W. *et al.* Comparison of EORTC quality of life core questionnaire (EORTC-  
45 QLQ-C30) and gastrointestinal quality of life index (GIQLI) in patients undergoing  
46 elective colorectal cancer resection. *Int J Colorectal Dis* **19**, 554–560 (2004).  
47  
48  
49  
50 25. Aminisani, N., Nikbakht, H., Asghari Jafarabadi, M. & Shamshirgaran, S. M. Depression,  
51 anxiety, and health related quality of life among colorectal cancer survivors. *J Gastrointest*  
52 *Oncol* **8**, 81–88 (2017).  
53  
54  
55  
56  
57  
58  
59  
60

- 1  
2  
3 26. Skarstein, J., Aass, N., Fosså, S. D., Skovlund, E. & Dahl, A. A. Anxiety and depression  
4 in cancer patients: relation between the Hospital Anxiety and Depression Scale and the  
5 European Organization for Research and Treatment of Cancer Core Quality of Life  
6 Questionnaire. *J Psychosom Res* **49**, 27–34 (2000).  
7  
8  
9  
10  
11  
12 27. Rodríguez-Luna, M. R., Guarneros-Zárate, J. E. & Tueme-Izaguirre, J. Total Mesorectal  
13 Excision, an erroneous anatomical term for the gold standard in rectal cancer treatment. *Int*  
14 *J Surg* **23**, 97–100 (2015).  
15  
16  
17  
18  
19 28. Crippa, J. *et al.* Robotic surgery for rectal cancer provides advantageous outcomes over  
20 laparoscopic approach: results from a large retrospective cohort. *Ann Surg* **274**, e1218–  
21 e1222 (2021).  
22  
23  
24  
25  
26 29. Zhu, G., Wu, Z., Lui, S., Hu, N. & Wu, M. Advances in imaging modalities and contrast  
27 agents for the early diagnosis of colorectal cancer. *J Biomed Nanotechnol* **17**, 558–581  
28 (2021).  
29  
30  
31  
32  
33 30. Keane, C., Wells, C., O’Grady, G. & Bissett, I. P. Defining low anterior resection  
34 syndrome: a systematic review of the literature. *Colorectal Dis* **19**, 713–722 (2017).  
35  
36  
37  
38 31. Croese, A. D., Lonie, J. M., Trollope, A. F., Vangaveti, V. N. & Ho, Y.-H. A meta-  
39 analysis of the prevalence of Low Anterior Resection Syndrome and systematic review of  
40 risk factors. *Int J Surg* **56**, 234–241 (2018).  
41  
42  
43  
44 32. Chau, A. *et al.* Toward the end of abdominoperineal resection for rectal cancer? An 8-year  
45 experience in 189 consecutive patients with low rectal cancer. *Ann Surg* **260**, 801–805;  
46 discussion 805-806 (2014).  
47  
48  
49  
50  
51 33. Rullier, E. *et al.* Sphincter-saving resection for all rectal carcinomas: the end of the 2-cm  
52 distal rule. *Ann Surgery* **241**, 465–469 (2005).  
53  
54  
55  
56 34. Bryant, C. L. C., Lunniss, P. J., Knowles, C. H., Thaha, M. A. & Chan, C. L. H. Anterior  
57 resection syndrome. *Lancet Oncol* **13**, e403-408 (2012).  
58  
59  
60



- 1  
2  
3 35. Ziv, Y., Zbar, A., Bar-Shavit, Y. & Igov, I. Low anterior resection syndrome (LARS):  
4  
5 cause and effect and reconstructive considerations. *Tech Coloproctol* **17**, 151–162 (2013).  
6  
7  
8 36. Näverlo, S., Gunnarsson, U. & Strigård, K. Rectal cancer patients from rural areas in  
9  
10 northern Sweden report more pain and problems with stoma care than those from urban  
11  
12 areas. *Rural Remote Health* **21**, 5471 (2021).  
13  
14  
15  
16  
17  
18  
19

### 20 **Figure 1. Schematic representation of the factors evaluated**

21 Taking into consideration clinical factors, EMPACOL evaluates, among non-clinical factors,  
22 using the CARE questionnaire, the impact of patient-perceived empathy on short-term  
23 (medical-surgical morbidity of each therapeutic step) and long-term outcomes (QoL, DFS and  
24 OS).  
25  
26  
27

### 28 **Figure 2. The EMPACOL study design**

29 The EMPACOL project aims to investigate the correlation between the CARE score and QoL  
30 at 6 months and 1 year after the end of the therapeutic strategy (secondary objective) and the  
31 oncological results in case of metachronous metastatic disease and on the overall survival at 5  
32 years of patients treated with curative intent for stage I-III CRC (primary objective).  
33 EMPACOL will start with a pilot study that will allow to study the optimal circuit for the  
34 delivery of the questionnaires and to identify the pre-existing systems put in place by the  
35 different centers  
36  
37  
38  
39

### 40 **Figure 3. Proposed questionnaire distribution circuit**

41 For Group 1 and Group 2 patients, the first CARE assessment is performed after the surgical  
42 consultation. For patients in group 3, after having met all the medical and paramedical staff. A  
43 second CARE score measurement will be performed at the end of the therapeutic sequence.  
44 Each CARE score measurement will be associated with an evaluation of the patient's state of  
45 anxiety and depression (HADS questionnaire) and QoL (QLQ C-30 questionnaire).  
46  
47  
48  
49  
50  
51  
52  
53  
54  
55  
56  
57  
58  
59  
60

1  
2  
3  
4  
5  
6  
7  
8  
9  
10  
11  
12  
13  
14  
15  
16  
17  
18  
19  
20  
21  
22  
23  
24  
25  
26  
27  
28  
29  
30  
31  
32  
33  
34  
35  
36  
37  
38  
39  
40  
41  
42  
43  
44  
45  
46  
47  
48  
49  
50  
51  
52  
53  
54  
55  
56  
57  
58  
59  
60

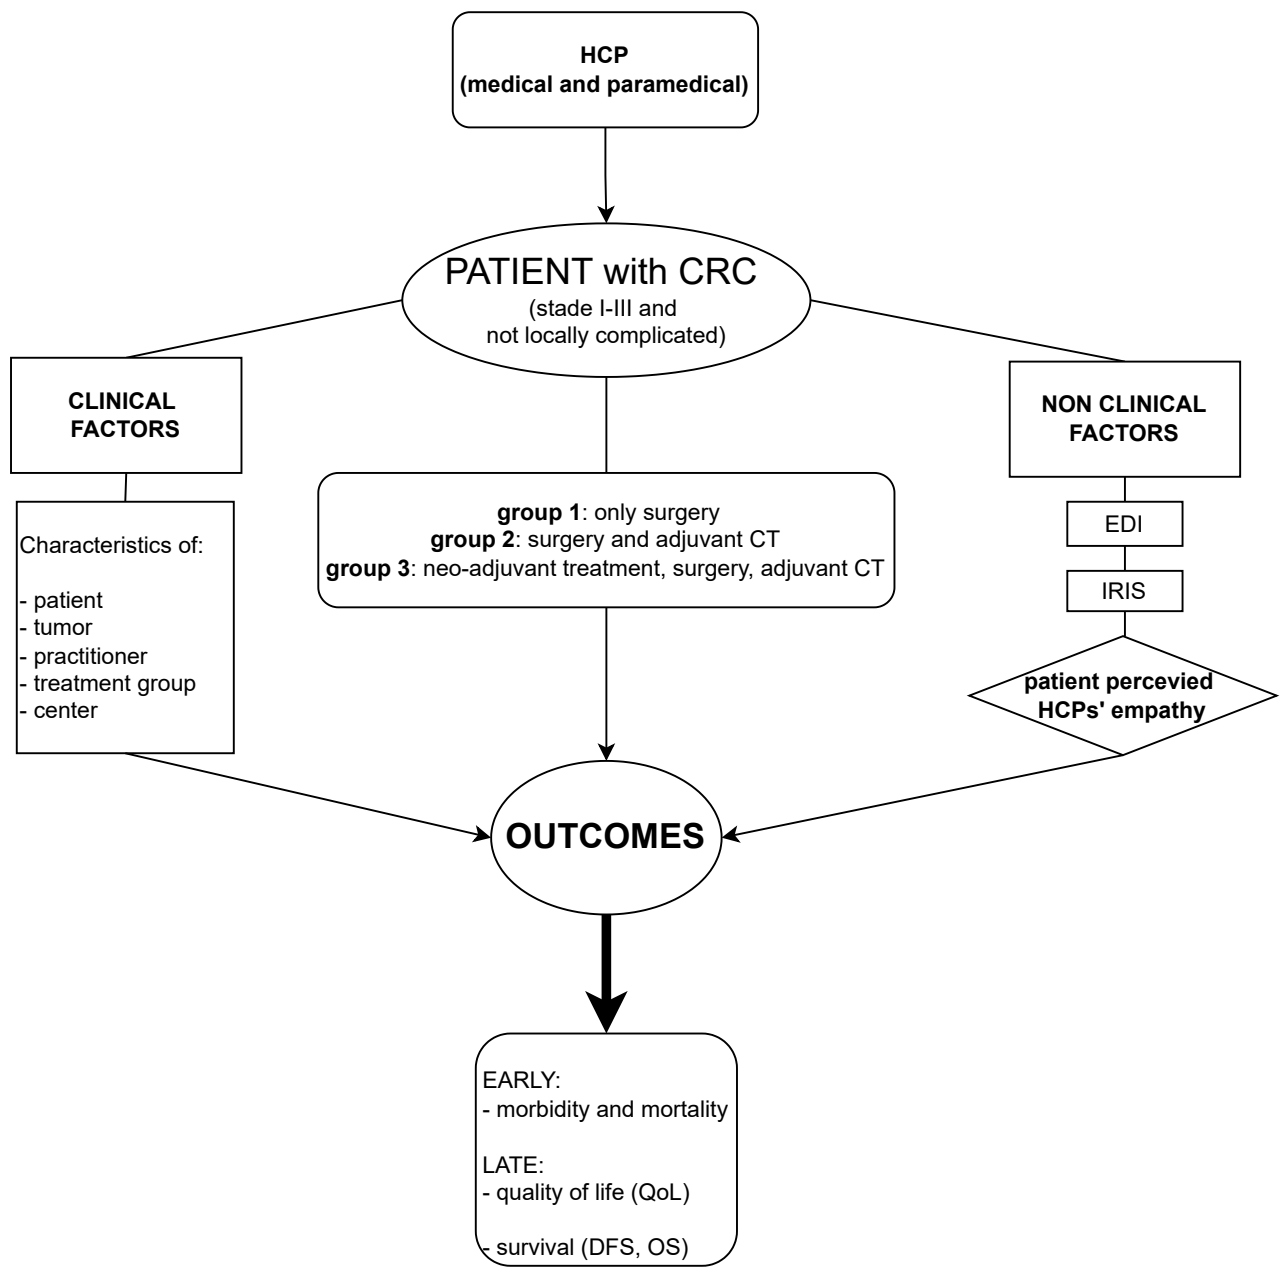

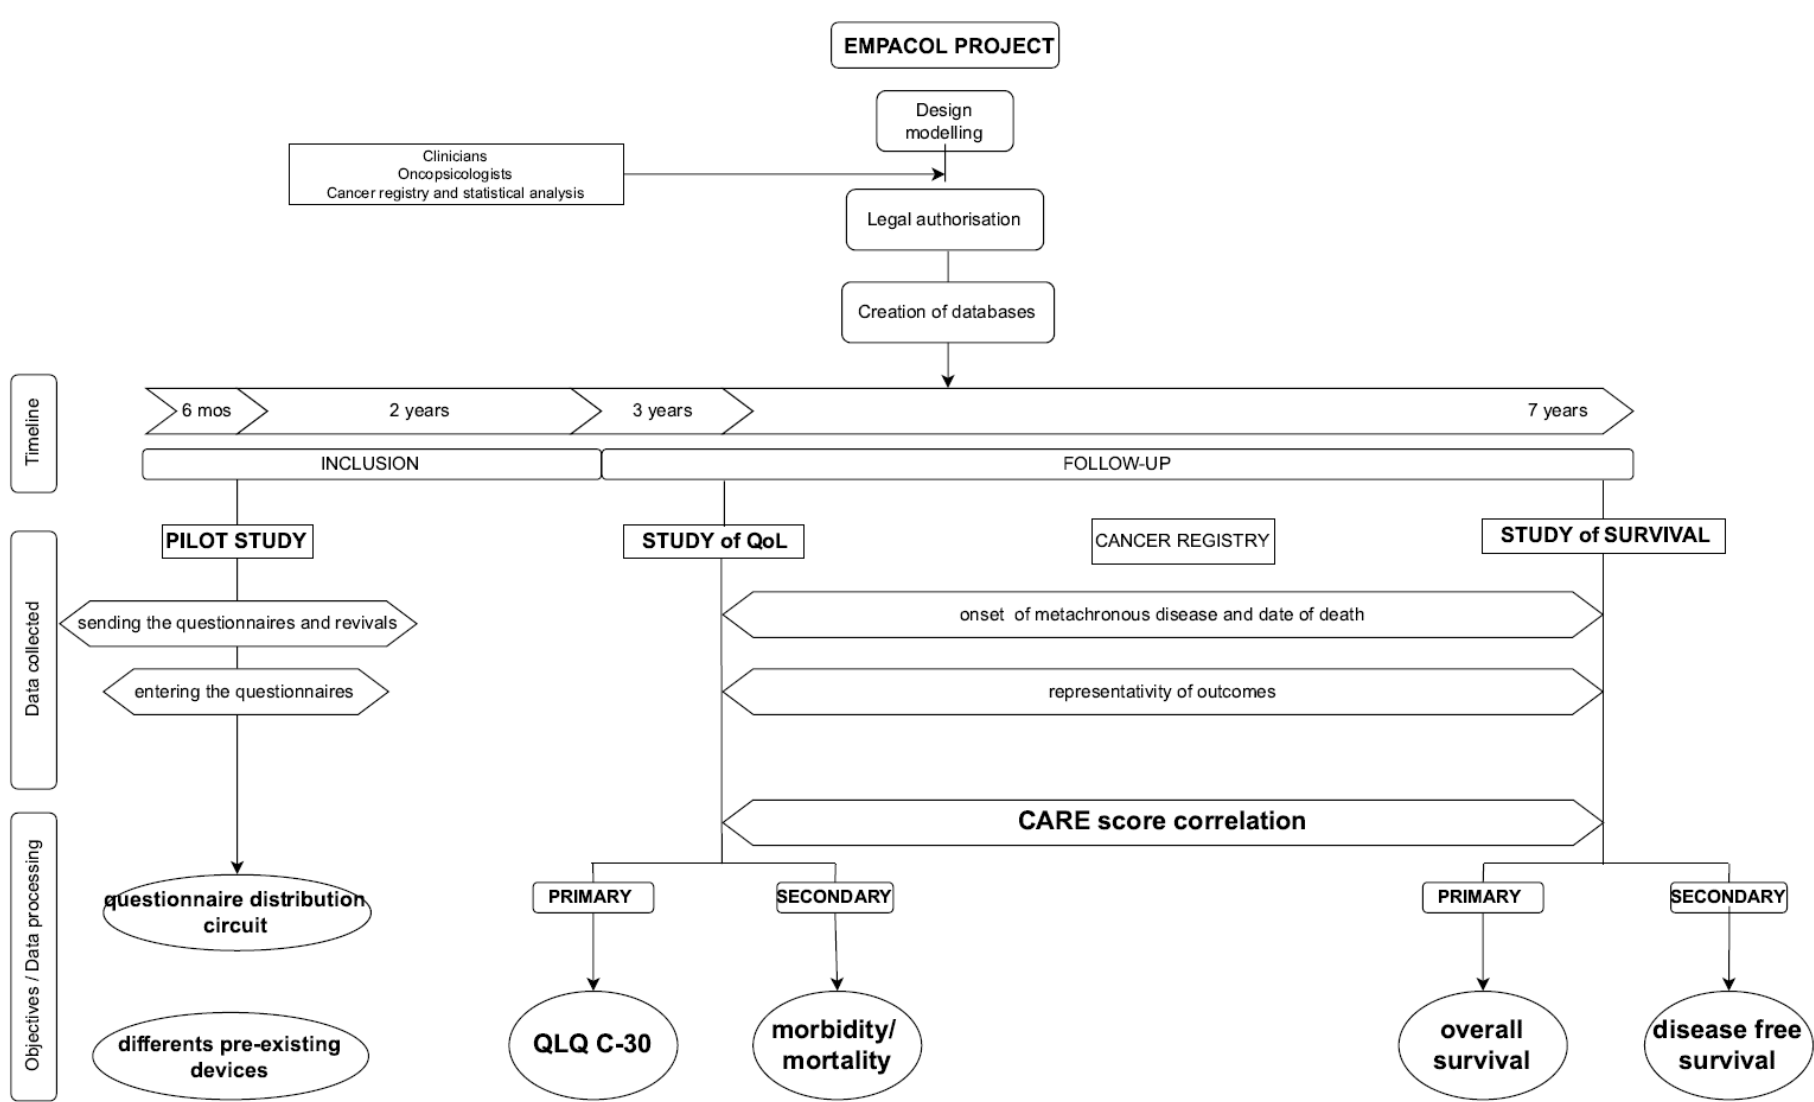

1  
2  
3  
4  
5  
6  
7  
8  
9  
10  
11  
12  
13  
14  
15  
16  
17  
18  
19  
20  
21  
22  
23  
24  
25  
26  
27  
28  
29  
30  
31  
32  
33  
34  
35  
36  
37  
38  
39  
40  
41

1  
2  
3  
4  
5  
6  
7  
8  
9  
10  
11  
12  
13  
14  
15  
16  
17  
18  
19  
20  
21  
22  
23  
24  
25  
26  
27  
28  
29  
30  
31  
32  
33  
34  
35  
36  
37  
38  
39  
40  
41  
42  
43  
44  
45  
46

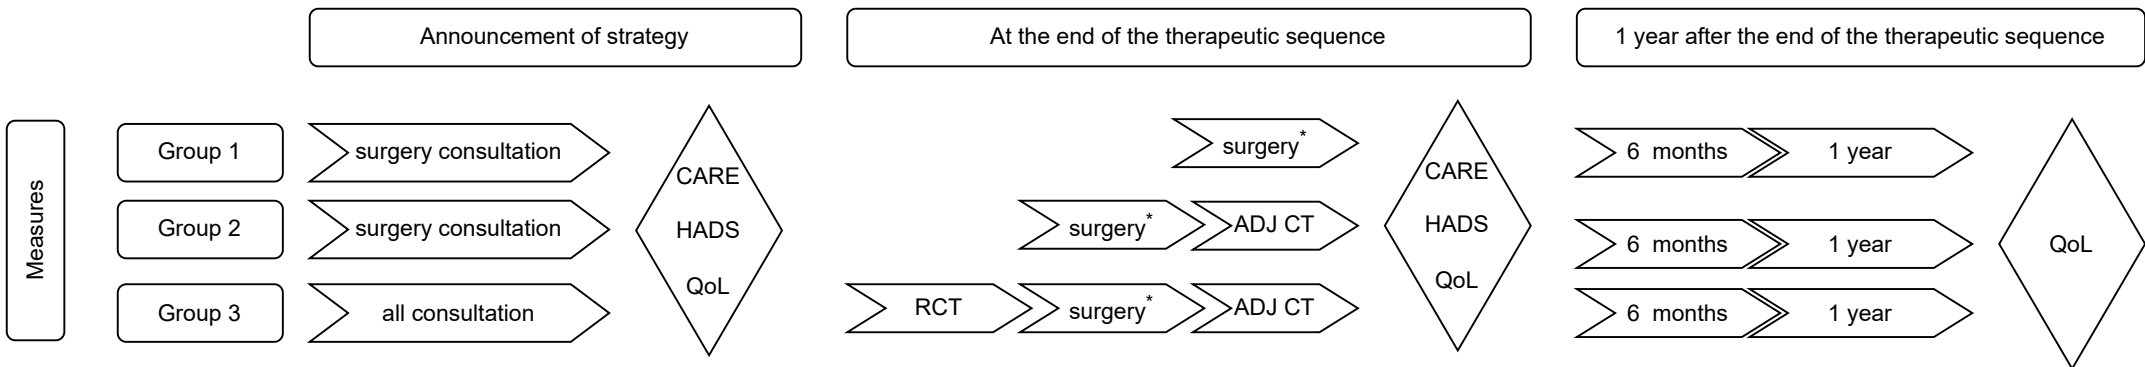

Supplement: bmjopen-2022-066559.draft_revisions.pdf [file bmjopen-2022-066559.draft_revisions.pdf]
